# Supplementary material for: The activity of base excision repair is positively correlated with the infiltration of CD4+ T cells in melanoma
Source: publisher site journal article supplement (doi:10.1515/oncologie-2025-0244), 2025-09-10
Supplement: Supplementary file 1 [file j_oncologie-2025-0244_suppl_001.xlsx]

## Sheet: ST.1
Supplementary Table S1. Baseline characteristics of MGSP cohort
Clinical factor		n (%)
Sex	Female	50 (41.32%)
	Male	71 (58.68%)
ECOG	Unknown	4 (3.31%)
	≥1	33 (27.27%)
	0	84 (69.42%)
LDH	Unknown	3 (2.48%)
	Elevated	60 (49.59%)
	No elevated	58 (47.93%)
Stage	M1a-M1c	111 (91.74%)
	Unresectable stage III	10 (8.26%)
Primary melanoma	Cutaneous	88 (72.73%)
	Others	33 (27.27%)
Biopsy site	Others	38 (31.40%)
	Skin	83 (68.60%)
Drug	Nivolumab	51 (42.15%)
	Pembrolizumab	70 (57.85%)
Treatment line of ICB	First line	62 (51.24%)
	Second line or later	59 (48.76%)
BOR	CR/PR	47 (38.84%)
	SD/MR/PD	74 (61.16%)
PFS event	No progression	35 (28.93%)
	Progression	86 (71.07%)
OS event	Living	59 (48.76%)
	Death	62 (51.24%)
Note: ECOG, Eastern Cooperative Oncology Group; LDH, lactate dehydrogenase; ICB, immune checkpoint blocker; BOR, best of response; PFS, progression-free survival; OS, overall survival; CR, complete response; PR, partial response; SD, stable disease; MR, mixed response; PD, progressive disease.

## Sheet: ST.2
Supplementary Table S2. Cox regression in MGSP cohort
PFS	Univariate		Multivariate
Clinical factor	HR (95% CI)	P value	HR (95% CI)	P value
Gender (male vs female)	1.056 (0.686-1.624)	0.805612	1.066 (0.669-1.699)	0.786893
ECOG (≥1 vs 0)	1.862 (1.178-2.945)	0.00783308	1.663 (0.980-2.824)	0.0595965
Stage (III vs M1a-M1c)	1.573 (0.784-3.156)	0.20208	0.588 (0.253-1.366)	0.217047
Biopsy site (Others vs skin)	1.552 (0.996-2.417)	0.0520457	1.528 (0.937-2.492)	0.0890012
ICB (pembrolizumab vs nivolumab)	1.093 (0.706-1.692)	0.689181	0.983 (0.604-1.600)	0.944397
ICB therapy line (second or later vs first)	1.386 (0.898-2.139)	0.139972	1.219 (0.738-2.014)	0.439652
BOR (CR/PR vs SD/MR/PD)	0.131 (0.075-0.229)	<0.001	0.087 (0.045-0.168)	<0.001
Immune score (high vs low)	0.554 (0.341-0.900)	0.0169878	1.900 (0.691-5.229)	0.213802
CD4+ T (high vs low)	0.434 (0.269-0.698)	0.000574204	0.227 (0.081-0.632)	0.00453431
OS	Univariate		Multivariate
Clinical factor	HR (95% CI)	P value	HR (95% CI)	P value
Gender (male vs female)	0.928 (0.562-1.533)	0.770489	0.764 (0.439-1.329)	0.340912
ECOG (≥1 vs 0)	2.138 (1.280-3.571)	0.00367684	1.689 (0.929-3.072)	0.0856933
Stage (III vs M1a-M1c)	0.384 (0.094-1.571)	0.182953	0.165 (0.036-0.752)	0.019862
Biopsy site (Others vs skin)	1.448 (0.856-2.449)	0.167553	1.446 (0.829-2.520)	0.193561
ICB (pembrolizumab vs nivolumab)	1.077 (0.648-1.788)	0.77576	1.353 (0.778-2.355)	0.284683
ICB therapy line (second or later vs first)	1.988 (1.182-3.343)	0.0096352	1.530 (0.875-2.677)	0.136015
BOR (CR/PR vs SD/MR/PD)	0.082 (0.035-0.194)	<0.001	0.062 (0.024-0.160)	<0.001
Immune score (high vs low)	0.566 (0.328-0.978)	0.0412187	1.523 (0.441-5.265)	0.5062
CD4+ T (high vs low)	0.507 (0.293-0.875)	0.0146782	0.288 (0.077-1.079)	0.0648126
Note: ECOG, Eastern Cooperative Oncology Group; ICB, immune checkpoint blocker; BOR, best of response; PFS, progression-free survival; OS, overall survival; CR, complete response; PR, partial response; SD, stable disease; MR, mixed response; PD, progressive disease

## Sheet: ST.3
Supplementary Table S3. The number of major cell types from single cell RNA-seq data set GSE222446
Cell type	Cell type	GSM6923535	GSM6923536	GSM6923537	GSM6923538	GSM6923539	GSM6923540	GSM6923541	GSM6923542	GSM6923543	GSM6923544	GSM6923545	GSM6923546	Total number
B cells	B cells	913	10	92	71	1552	117	165	93	155	26	587	76	3857
Endothelial cells	Endothelial cells	300	7	187	10	6	36	28	28	30	20	25	6	683
Epithelial cells	Epithelial cells	137	222	51	12	72	303	265	2100	1124	408	121	35	4850
Fibroblasts	Fibroblasts	1562	73	37	42	34	1032	13	134	84	14	2	21	3048
Monocytes/Macrophages	Monocytes/Macrophages	466	120	637	90	211	385	289	948	666	279	469	226	4786
Melanoma cells	BER type	58	229	182	89	33	190	12	1401	1977	462	27	31	4691
	Lipid metabolic type	757	2006	4674	3572	750	1553	533	3618	6649	2123	314	1066	27615
	MYC type	721	663	1891	2180	380	449	469	5537	4832	1639	402	468	19631
	Inflammatory type	67	22	131	31	78	112	39	508	104	26	32	25	1175
T cells	Central memory CD8+ T cell	393	42	181	29	1564	184	219	39	267	59	1039	131	4147
	Early activated CD8+ T cell	206	13	106	9	184	134	169	38	116	24	154	24	1177
	Effector CD8+ T cell	205	24	53	17	477	119	114	28	110	39	404	50	1640
	Exhausted CD8+ T cell	771	51	444	30	358	1547	2009	70	304	64	493	93	6234
	ISG CD8+ T cell	101	5	46	1	20	59	38	6	19	3	100	12	410
	Natural regulatory T cell	6	0	4	0	6	17	11	1	5	0	22	3	75
	Regulatory CD4+ T cell	244	42	84	21	437	387	272	52	311	22	261	51	2184
	Follicular helper CD4+ T cell	70	12	26	5	117	166	91	9	71	4	92	21	684

## Sheet: ST.4
Suppelmentary Table S4. Marker genes identified for each of four subclusters of melanoma cells in GSE222446
Seurat cluster	Marker gene	p_val	avg_log2FC	pct.1	pct.2	p_val_adj
Lipid metabolic type	SOX10	0	1.37981	0.743	0.208	0
Lipid metabolic type	FAM210B	0	1.41257	0.783	0.257	0
Lipid metabolic type	PLP1	0	1.92402	0.728	0.206	0
Lipid metabolic type	MITF	0	1.38661	0.854	0.337	0
Lipid metabolic type	S100A13	0	1.15781	0.923	0.409	0
Lipid metabolic type	MYO10	0	1.06882	0.783	0.275	0
Lipid metabolic type	CAV1	0	1.50496	0.727	0.222	0
Lipid metabolic type	EDNRB	0	1.53358	0.729	0.227	0
Lipid metabolic type	ST3GAL4	0	1.29509	0.722	0.222	0
Lipid metabolic type	SYNGR1	0	1.32409	0.718	0.22	0
Lipid metabolic type	TCEAL4	0	1.12993	0.807	0.313	0
Lipid metabolic type	VAT1	0	1.724	0.687	0.194	0
Lipid metabolic type	CHCHD6	0	1.40987	0.768	0.277	0
Lipid metabolic type	BACE2	0	1.26374	0.711	0.22	0
Lipid metabolic type	S100A1	0	1.50531	0.837	0.348	0
Lipid metabolic type	TIMP2	0	1.37501	0.795	0.311	0
Lipid metabolic type	ERBB3	0	1.13231	0.705	0.221	0
Lipid metabolic type	GPM6B	0	1.02571	0.764	0.281	0
Lipid metabolic type	S100B	0	1.40761	0.963	0.481	0
Lipid metabolic type	CAPN3	0	2.07906	0.654	0.173	0
Lipid metabolic type	PTTG1IP	0	1.17927	0.882	0.405	0
Lipid metabolic type	METRN	0	1.109	0.741	0.277	0
Lipid metabolic type	SERPINE2	0	1.49193	0.9	0.438	0
Lipid metabolic type	TFAP2A	0	1.23978	0.733	0.273	0
Lipid metabolic type	LGALS3BP	0	1.16942	0.723	0.264	0
Lipid metabolic type	SNHG16	0	1.44595	0.779	0.324	0
Lipid metabolic type	SFRP1	0	1.17417	0.707	0.255	0
Lipid metabolic type	CD59	0	1.20298	0.959	0.507	0
Lipid metabolic type	CBR1	0	1.18441	0.702	0.25	0
Lipid metabolic type	RGS20	0	1.83505	0.595	0.149	0
Lipid metabolic type	PRAME	0	1.28429	0.718	0.274	0
Lipid metabolic type	CYSTM1	0	1.43027	0.652	0.21	0
Lipid metabolic type	MIA	0	1.47511	0.658	0.217	0
Lipid metabolic type	DSTN	0	1.30023	0.807	0.371	0
Lipid metabolic type	MLANA	0	1.54704	0.884	0.448	0
Lipid metabolic type	SNCA	0	1.42231	0.61	0.177	0
Lipid metabolic type	CTSL	0	1.14961	0.735	0.305	0
Lipid metabolic type	PYGL	0	1.20703	0.651	0.222	0
Lipid metabolic type	TYR	0	1.37248	0.613	0.184	0
Lipid metabolic type	QPRT	0	1.24621	0.612	0.184	0
Lipid metabolic type	ASAH1	0	1.32007	0.72	0.293	0
Lipid metabolic type	COMT	0	1.08277	0.704	0.278	0
Lipid metabolic type	PIR	0	1.54394	0.569	0.146	0
Lipid metabolic type	ATP1A1	0	1.12357	0.934	0.513	0
Lipid metabolic type	MLPH	0	1.26207	0.574	0.155	0
Lipid metabolic type	ST3GAL6	0	1.09564	0.631	0.213	0
Lipid metabolic type	MFGE8	0	1.21403	0.669	0.252	0
Lipid metabolic type	TUBB2A	0	1.08657	0.649	0.233	0
Lipid metabolic type	TIMP3	0	1.28996	0.626	0.212	0
Lipid metabolic type	HES1	0	1.3339	0.701	0.288	0
Lipid metabolic type	COA3	0	1.08021	0.62	0.209	0
Lipid metabolic type	GPR143	0	1.73086	0.544	0.134	0
Lipid metabolic type	GMPR	0	1.27111	0.587	0.178	0
Lipid metabolic type	SGCD	0	1.15064	0.563	0.156	0
Lipid metabolic type	ROPN1B	0	1.20314	0.552	0.147	0
Lipid metabolic type	APOD	0	1.94187	0.774	0.371	0
Lipid metabolic type	CRYAB	0	1.3184	0.809	0.406	0
Lipid metabolic type	TRIM2	0	1.34001	0.547	0.145	0
Lipid metabolic type	CNP	0	1.11822	0.589	0.187	0
Lipid metabolic type	NSG1	0	1.9595	0.533	0.132	0
Lipid metabolic type	PRXL2A	0	1.5083	0.57	0.17	0
Lipid metabolic type	SLCO4A1-AS1	0	1.37215	0.571	0.173	0
Lipid metabolic type	HIST3H2A	0	1.28192	0.556	0.159	0
Lipid metabolic type	NEDD4L	0	1.43471	0.552	0.157	0
Lipid metabolic type	LINC00511	0	1.19218	0.554	0.163	0
Lipid metabolic type	GLMP	0	1.40527	0.522	0.139	0
Lipid metabolic type	TBCA	0	1.1811	0.876	0.493	0
Lipid metabolic type	STXBP1	0	1.36526	0.544	0.168	0
Lipid metabolic type	AIF1L	0	1.15645	0.532	0.156	0
Lipid metabolic type	RAB38	0	1.7912	0.505	0.129	0
Lipid metabolic type	C11orf96	0	1.64754	0.553	0.182	0
Lipid metabolic type	ADGRG1	0	1.22673	0.517	0.148	0
Lipid metabolic type	ACP5	0	1.02402	0.567	0.199	0
Lipid metabolic type	APOE	0	1.04501	0.936	0.569	0
Lipid metabolic type	STK32A	0	1.01301	0.525	0.159	0
Lipid metabolic type	SERPINF1	0	1.20423	0.643	0.277	0
Lipid metabolic type	FMNL2	0	1.07731	0.505	0.145	0
Lipid metabolic type	LGALS3	0	1.72771	0.667	0.31	0
Lipid metabolic type	SCD	0	1.54627	0.49	0.133	0
Lipid metabolic type	SLC39A6	0	1.289	0.493	0.136	0
Lipid metabolic type	SMIM30	0	1.05164	0.522	0.167	0
Lipid metabolic type	EMP1	0	1.01203	0.569	0.217	0
Lipid metabolic type	EGR1	0	1.00276	0.759	0.408	0
Lipid metabolic type	FMN1	0	1.1267	0.506	0.155	0
Lipid metabolic type	SLC26A2	0	1.68831	0.487	0.137	0
Lipid metabolic type	EXOSC4	0	1.17405	0.487	0.137	0
Lipid metabolic type	PMEL	0	1.67079	0.767	0.418	0
Lipid metabolic type	GNPDA1	0	1.0802	0.511	0.162	0
Lipid metabolic type	DDX1	0	1.08149	0.532	0.184	0
Lipid metabolic type	SQSTM1	0	1.22215	0.79	0.444	0
Lipid metabolic type	SLC6A8	0	1.2625	0.46	0.114	0
Lipid metabolic type	GPR137B	0	1.01188	0.503	0.16	0
Lipid metabolic type	TRIP6	0	1.06326	0.493	0.15	0
Lipid metabolic type	IGSF3	0	1.00726	0.48	0.141	0
Lipid metabolic type	GSTP1	0	1.28405	0.894	0.555	0
Lipid metabolic type	AKAP12	0	1.0147	0.513	0.177	0
Lipid metabolic type	MRPL24	0	1.00318	0.483	0.149	0
Lipid metabolic type	GSTM3	0	1.36877	0.486	0.155	0
Lipid metabolic type	NDUFAF2	0	1.13331	0.48	0.149	0
Lipid metabolic type	DCT	0	1.06824	0.71	0.381	0
Lipid metabolic type	MAFF	0	1.01367	0.514	0.186	0
Lipid metabolic type	CAV2	0	1.64741	0.413	0.085	0
Lipid metabolic type	CTSF	0	1.04779	0.467	0.141	0
Lipid metabolic type	SPIRE1	0	1.11638	0.45	0.126	0
Lipid metabolic type	ZCCHC9	0	1.21107	0.485	0.161	0
Lipid metabolic type	TSPAN10	0	1.60983	0.421	0.097	0
Lipid metabolic type	GAS7	0	1.22464	0.489	0.166	0
Lipid metabolic type	QPCT	0	2.13046	0.423	0.102	0
Lipid metabolic type	CCND1	0	1.43136	0.471	0.151	0
Lipid metabolic type	HACD1	0	1.03206	0.45	0.131	0
Lipid metabolic type	ROPN1	0	1.4802	0.411	0.092	0
Lipid metabolic type	NNT-AS1	0	1.02962	0.456	0.139	0
Lipid metabolic type	MXRA7	0	1.28345	0.429	0.112	0
Lipid metabolic type	TPP1	0	1.01892	0.498	0.185	0
Lipid metabolic type	PHLDA3	0	1.77733	0.405	0.093	0
Lipid metabolic type	HOXB7	0	1.43016	0.408	0.096	0
Lipid metabolic type	CYP27A1	0	1.46939	0.405	0.094	0
Lipid metabolic type	NAV2	0	1.11247	0.434	0.124	0
Lipid metabolic type	S100A16	0	1.6566	0.397	0.093	0
Lipid metabolic type	EVA1A	0	1.37914	0.399	0.095	0
Lipid metabolic type	SLC24A5	0	1.70956	0.374	0.071	0
Lipid metabolic type	CTSK	0	1.218	0.476	0.174	0
Lipid metabolic type	PYGB	0	1.23592	0.422	0.12	0
Lipid metabolic type	MGAT1	0	1.09084	0.487	0.186	0
Lipid metabolic type	MFSD12	0	1.03192	0.451	0.155	0
Lipid metabolic type	MRPL44	0	1.01136	0.426	0.13	0
Lipid metabolic type	AAMDC	0	1.08181	0.434	0.138	0
Lipid metabolic type	TMEM101	0	1.14488	0.42	0.127	0
Lipid metabolic type	AZGP1	0	1.64637	0.377	0.087	0
Lipid metabolic type	PLAT	0	1.75833	0.425	0.135	0
Lipid metabolic type	ILVBL	0	1.25524	0.398	0.11	0
Lipid metabolic type	DST	0	1.10364	0.49	0.202	0
Lipid metabolic type	PEG10	0	1.04888	0.474	0.187	0
Lipid metabolic type	RARS	0	1.04263	0.428	0.142	0
Lipid metabolic type	F2R	0	1.20501	0.451	0.167	0
Lipid metabolic type	TEAD1	0	1.0155	0.414	0.133	0
Lipid metabolic type	CTTN	0	1.02953	0.427	0.149	0
Lipid metabolic type	EIF4EBP3	0	1.05634	0.375	0.1	0
Lipid metabolic type	MORN2	0	1.09137	0.379	0.105	0
Lipid metabolic type	FXYD3	0	1.6737	0.392	0.12	0
Lipid metabolic type	TRIM63	0	1.63767	0.338	0.067	0
Lipid metabolic type	PCYOX1	0	1.24704	0.365	0.096	0
Lipid metabolic type	TUBB4A	0	1.71398	0.337	0.069	0
Lipid metabolic type	GDF15	0	1.86966	0.405	0.138	0
Lipid metabolic type	HES6	0	1.45253	0.374	0.108	0
Lipid metabolic type	CDK2	0	1.19979	0.375	0.109	0
Lipid metabolic type	GAPDHS	0	1.72981	0.351	0.086	0
Lipid metabolic type	PTPRZ1	0	1.9399	0.336	0.072	0
Lipid metabolic type	SERPINA3	0	2.13872	0.37	0.107	0
Lipid metabolic type	CD63	0	1.14603	0.993	0.731	0
Lipid metabolic type	PIK3CD-AS2	0	1.15402	0.347	0.086	0
Lipid metabolic type	FAM167B	0	1.73892	0.327	0.066	0
Lipid metabolic type	SHC4	0	1.47116	0.326	0.066	0
Lipid metabolic type	PON2	0	1.01635	0.36	0.102	0
Lipid metabolic type	CA14	0	1.42493	0.335	0.078	0
Lipid metabolic type	LINC00467	0	1.24605	0.349	0.093	0
Lipid metabolic type	DUSP3	0	1.23313	0.346	0.09	0
Lipid metabolic type	FAM114A1	0	1.10119	0.362	0.107	0
Lipid metabolic type	TBC1D16	0	1.25457	0.353	0.098	0
Lipid metabolic type	RRAGD	0	1.41074	0.327	0.075	0
Lipid metabolic type	MET	0	1.67722	0.321	0.069	0
Lipid metabolic type	DHX40	0	1.02736	0.361	0.109	0
Lipid metabolic type	GPX8	0	1.06844	0.359	0.109	0
Lipid metabolic type	SDC3	0	1.24876	0.372	0.123	0
Lipid metabolic type	HEBP1	0	1.03738	0.363	0.116	0
Lipid metabolic type	C11orf74	0	1.42411	0.324	0.078	0
Lipid metabolic type	SORBS1	0	1.46713	0.322	0.077	0
Lipid metabolic type	NQO1	0	1.77634	0.323	0.081	0
Lipid metabolic type	CITED1	0	1.92396	0.304	0.062	0
Lipid metabolic type	FARP2	0	1.13293	0.333	0.093	0
Lipid metabolic type	LRMDA	0	1.09867	0.337	0.102	0
Lipid metabolic type	RTP4	0	1.05172	0.313	0.078	0
Lipid metabolic type	PFN2	0	1.22829	0.323	0.089	0
Lipid metabolic type	QDPR	0	1.79323	0.314	0.08	0
Lipid metabolic type	ABCB5	0	1.47657	0.287	0.056	0
Lipid metabolic type	CDH1	0	2.12138	0.281	0.051	0
Lipid metabolic type	PLEKHB1	0	1.91265	0.286	0.056	0
Lipid metabolic type	ZNF703	0	1.54454	0.295	0.066	0
Lipid metabolic type	NBL1	0	1.55019	0.376	0.148	0
Lipid metabolic type	G6PC3	0	1.14394	0.314	0.086	0
Lipid metabolic type	LZTS1	0	1.11679	0.307	0.082	0
Lipid metabolic type	FOXD3-AS1	0	1.1236	0.296	0.072	0
Lipid metabolic type	EGR3	0	1.30943	0.327	0.104	0
Lipid metabolic type	AC027130.1	0	1.38791	0.311	0.088	0
Lipid metabolic type	DAAM2	0	1.23682	0.304	0.081	0
Lipid metabolic type	SNHG19	0	1.0803	0.306	0.083	0
Lipid metabolic type	GJB1	0	1.80548	0.272	0.051	0
Lipid metabolic type	BCAS3	0	1.20148	0.307	0.086	0
Lipid metabolic type	KLHDC8B	0	1.19417	0.298	0.077	0
Lipid metabolic type	WIPI1	0	1.35972	0.288	0.067	0
Lipid metabolic type	BHLHE41	0	1.7131	0.306	0.086	0
Lipid metabolic type	HSPB2	0	1.99084	0.271	0.052	0
Lipid metabolic type	C11orf1	0	1.15924	0.31	0.095	0
Lipid metabolic type	LINC00518	0	1.41532	0.275	0.061	0
Lipid metabolic type	TUBB3	0	1.70275	0.292	0.078	0
Lipid metabolic type	LINC00920	0	1.26638	0.276	0.063	0
Lipid metabolic type	AC015802.6	0	1.26655	0.284	0.071	0
Lipid metabolic type	FBXO25	0	1.03965	0.294	0.083	0
Lipid metabolic type	DEPP1	0	1.18388	0.309	0.099	0
Lipid metabolic type	FASN	0	1.05956	0.286	0.082	0
Lipid metabolic type	SRPX	0	1.40396	0.267	0.064	0
Lipid metabolic type	TRPM1	0	1.42241	0.281	0.08	0
Lipid metabolic type	CHPF	0	1.20321	0.274	0.074	0
Lipid metabolic type	PLA1A	0	1.97511	0.247	0.047	0
Lipid metabolic type	ITGB8	0	1.31198	0.274	0.075	0
Lipid metabolic type	LSAMP	0	1.12175	0.281	0.084	0
Lipid metabolic type	SEZ6L2	0	2.00767	0.239	0.042	0
Lipid metabolic type	MAP1B	0	1.38852	0.288	0.092	0
Lipid metabolic type	RBPMS	0	1.08803	0.264	0.069	0
Lipid metabolic type	CPQ	0	1.18034	0.305	0.111	0
Lipid metabolic type	LINC02609	0	1.33174	0.247	0.054	0
Lipid metabolic type	PET117	0	1.32359	0.256	0.063	0
Lipid metabolic type	EXOC3	0	1.14668	0.315	0.124	0
Lipid metabolic type	FKBP9	0	1.00343	0.272	0.081	0
Lipid metabolic type	IGSF11	0	1.0738	0.254	0.064	0
Lipid metabolic type	MIR4458HG	0	1.39702	0.238	0.048	0
Lipid metabolic type	SLC45A2	0	2.25632	0.221	0.031	0
Lipid metabolic type	GSTZ1	0	1.18973	0.254	0.064	0
Lipid metabolic type	SLC25A23	0	1.12139	0.253	0.063	0
Lipid metabolic type	NARS2	0	1.07612	0.259	0.07	0
Lipid metabolic type	CSPG4	0	1.39505	0.251	0.062	0
Lipid metabolic type	SPR	0	1.68332	0.232	0.044	0
Lipid metabolic type	HOXD-AS2	0	1.19606	0.246	0.058	0
Lipid metabolic type	PLEKHH1	0	1.33432	0.233	0.046	0
Lipid metabolic type	SCCPDH	0	1.24671	0.277	0.093	0
Lipid metabolic type	PROS1	0	1.59271	0.249	0.065	0
Lipid metabolic type	HRK	0	1.34388	0.245	0.061	0
Lipid metabolic type	MYO1D	0	1.00469	0.252	0.069	0
Lipid metabolic type	CEACAM1	0	1.01202	0.253	0.07	0
Lipid metabolic type	PFKM	0	1.19056	0.237	0.056	0
Lipid metabolic type	BIRC7	0	1.43727	0.23	0.051	0
Lipid metabolic type	UGDH	0	1.38367	0.248	0.069	0
Lipid metabolic type	DIPK1C	0	1.21765	0.23	0.053	0
Lipid metabolic type	SLC1A4	0	1.09301	0.261	0.085	0
Lipid metabolic type	TNFRSF21	0	1.25747	0.247	0.071	0
Lipid metabolic type	PAQR8	0	1.263	0.236	0.06	0
Lipid metabolic type	KREMEN1	0	1.50038	0.224	0.048	0
Lipid metabolic type	S100A6	0	1.10887	0.916	0.741	0
Lipid metabolic type	PRUNE2	0	1.40144	0.219	0.044	0
Lipid metabolic type	CRTAC1	0	1.50311	0.223	0.048	0
Lipid metabolic type	C11orf24	0	1.01198	0.247	0.072	0
Lipid metabolic type	ALDH1A1	0	1.44866	0.227	0.053	0
Lipid metabolic type	ENTPD6	0	1.08297	0.231	0.057	0
Lipid metabolic type	RAB17	0	1.47223	0.218	0.047	0
Lipid metabolic type	SLC16A4	0	1.1634	0.22	0.05	0
Lipid metabolic type	PACSIN3	0	1.05474	0.236	0.066	0
Lipid metabolic type	TBX2	0	1.0086	0.237	0.067	0
Lipid metabolic type	LAMC1	0	1.13554	0.25	0.081	0
Lipid metabolic type	FADS1	0	1.12792	0.241	0.072	0
Lipid metabolic type	FAH	0	1.34144	0.219	0.05	0
Lipid metabolic type	IDI2-AS1	0	1.24498	0.212	0.044	0
Lipid metabolic type	SLC7A8	0	1.26625	0.244	0.078	0
Lipid metabolic type	VEPH1	0	2.10357	0.196	0.031	0
Lipid metabolic type	MELTF	0	1.14372	0.218	0.053	0
Lipid metabolic type	PDE3A	0	1.58851	0.218	0.053	0
Lipid metabolic type	TRAF3IP2	0	1.16646	0.217	0.053	0
Lipid metabolic type	FAXDC2	0	1.10198	0.218	0.055	0
Lipid metabolic type	CDC42EP4	0	1.12802	0.227	0.065	0
Lipid metabolic type	PGF	0	1.5845	0.206	0.044	0
Lipid metabolic type	ESRP1	0	1.24447	0.206	0.045	0
Lipid metabolic type	ARMC9	0	1.03703	0.22	0.06	0
Lipid metabolic type	ACY1	0	1.02882	0.215	0.056	0
Lipid metabolic type	RBMS3	0	1.19583	0.217	0.06	0
Lipid metabolic type	TUBB2B	0	1.17465	0.258	0.101	0
Lipid metabolic type	AHNAK2	0	1.49267	0.195	0.038	0
Lipid metabolic type	GULP1	0	1.13226	0.214	0.058	0
Lipid metabolic type	DMKN	0	1.19505	0.225	0.069	0
Lipid metabolic type	LDLRAD3	0	1.08047	0.219	0.064	0
Lipid metabolic type	UBXN8	0	1.11882	0.204	0.049	0
Lipid metabolic type	MAL	0	1.06317	0.273	0.119	0
Lipid metabolic type	KCNJ13	0	2.24132	0.178	0.024	0
Lipid metabolic type	HOXC9	0	1.09275	0.212	0.058	0
Lipid metabolic type	LARP6	0	1.15626	0.209	0.055	0
Lipid metabolic type	PPT2	0	1.20221	0.199	0.047	0
Lipid metabolic type	FAM229B	0	1.08239	0.202	0.05	0
Lipid metabolic type	MFAP3L	0	1.00459	0.205	0.053	0
Lipid metabolic type	GSTA4	0	1.15532	0.21	0.058	0
Lipid metabolic type	MCF2L	0	1.03992	0.199	0.049	0
Lipid metabolic type	SEMA5A	0	1.53393	0.198	0.049	0
Lipid metabolic type	EGFL8	0	1.36475	0.207	0.058	0
Lipid metabolic type	BCAN	0	1.44547	0.218	0.07	0
Lipid metabolic type	RTKN	0	1.22697	0.192	0.045	0
Lipid metabolic type	FHL2	0	1.38587	0.191	0.044	0
Lipid metabolic type	ANO10	0	1.06242	0.196	0.049	0
Lipid metabolic type	FAHD2B	0	1.39867	0.186	0.039	0
Lipid metabolic type	AKAP6	0	1.55486	0.182	0.035	0
Lipid metabolic type	STXBP6	0	1.47085	0.191	0.045	0
Lipid metabolic type	AC018521.5	0	1.01869	0.197	0.051	0
Lipid metabolic type	NEIL2	0	1.14361	0.188	0.044	0
Lipid metabolic type	TNFRSF19	0	1.25867	0.195	0.051	0
Lipid metabolic type	POLR3G	0	1.18497	0.19	0.047	0
Lipid metabolic type	LINC01116	0	1.2096	0.196	0.054	0
Lipid metabolic type	RAB6B	0	1.98805	0.169	0.027	0
Lipid metabolic type	LRRN4CL	0	1.1602	0.195	0.053	0
Lipid metabolic type	LINC02802	0	1.12166	0.189	0.048	0
Lipid metabolic type	FRMD6	0	1.05008	0.199	0.058	0
Lipid metabolic type	ARNT2	0	1.09301	0.189	0.048	0
Lipid metabolic type	MIR3681HG	0	1.46458	0.178	0.037	0
Lipid metabolic type	NR2F1-AS1	0	1.14749	0.208	0.067	0
Lipid metabolic type	TMEM54	0	1.59891	0.181	0.041	0
Lipid metabolic type	MPZ	0	2.26094	0.17	0.031	0
Lipid metabolic type	AL445524.1	0	1.00535	0.188	0.049	0
Lipid metabolic type	PCSK1N	0	1.10697	0.206	0.068	0
Lipid metabolic type	NANOS1	0	1.38199	0.181	0.044	0
Lipid metabolic type	TMEM220	0	1.05041	0.191	0.054	0
Lipid metabolic type	AC090204.1	0	1.0685	0.198	0.062	0
Lipid metabolic type	HOMER2	0	1.6004	0.17	0.034	0
Lipid metabolic type	HSD17B14	0	1.36527	0.173	0.037	0
Lipid metabolic type	AC020907.1	0	1.03325	0.187	0.052	0
Lipid metabolic type	OCA2	0	1.57229	0.175	0.04	0
Lipid metabolic type	SOX2	0	1.1508	0.186	0.054	0
Lipid metabolic type	ABCD1	0	1.06041	0.178	0.046	0
Lipid metabolic type	TRNP1	0	1.42311	0.167	0.036	0
Lipid metabolic type	RXRG	0	1.35844	0.167	0.036	0
Lipid metabolic type	EFHD1	0	1.47115	0.195	0.064	0
Lipid metabolic type	P4HA2	0	1.29449	0.174	0.044	0
Lipid metabolic type	GPR161	0	1.10951	0.175	0.046	0
Lipid metabolic type	SEPTIN4	0	1.05069	0.171	0.044	0
Lipid metabolic type	CC2D2A	0	1.00771	0.169	0.043	0
Lipid metabolic type	FZD3	0	1.2887	0.164	0.038	0
Lipid metabolic type	B4GAT1	0	1.2479	0.163	0.037	0
Lipid metabolic type	LINC01443	0	2.22237	0.141	0.016	0
Lipid metabolic type	PLPP2	0	1.67961	0.157	0.033	0
Lipid metabolic type	SMIM1	0	1.44092	0.155	0.032	0
Lipid metabolic type	AC009063.3	0	1.68278	0.15	0.027	0
Lipid metabolic type	CSAG1	0	1.61361	0.161	0.038	0
Lipid metabolic type	FOXD3	0	1.21908	0.172	0.049	0
Lipid metabolic type	PODXL2	0	1.0587	0.166	0.045	0
Lipid metabolic type	GREB1	0	1.70771	0.15	0.029	0
Lipid metabolic type	LINC02381	0	1.46914	0.152	0.032	0
Lipid metabolic type	LINC01697	0	2.13436	0.139	0.02	0
Lipid metabolic type	SCARB1	0	1.05135	0.161	0.043	0
Lipid metabolic type	SEMA3B	0	1.3485	0.147	0.03	0
Lipid metabolic type	TPCN2	0	1.04792	0.157	0.04	0
Lipid metabolic type	SNHG18	0	1.01269	0.154	0.038	0
Lipid metabolic type	DNAJC18	0	1.08031	0.152	0.036	0
Lipid metabolic type	AGAP2-AS1	0	1.37243	0.147	0.031	0
Lipid metabolic type	CCN5	0	1.6579	0.144	0.028	0
Lipid metabolic type	PRELP	0	1.08393	0.157	0.042	0
Lipid metabolic type	AC012306.3	0	1.43084	0.144	0.029	0
Lipid metabolic type	CPN1	0	1.69861	0.145	0.03	0
Lipid metabolic type	DLL3	0	1.54926	0.148	0.033	0
Lipid metabolic type	ITGA3	0	1.0013	0.16	0.046	0
Lipid metabolic type	BBS5	0	1.13871	0.144	0.031	0
Lipid metabolic type	SMOX	0	1.2239	0.147	0.034	0
Lipid metabolic type	PLCB4	0	1.2626	0.16	0.048	0
Lipid metabolic type	PSEN2	0	1.30389	0.142	0.03	0
Lipid metabolic type	THNSL2	0	1.41407	0.139	0.028	0
Lipid metabolic type	ECM1	0	1.31242	0.151	0.04	0
Lipid metabolic type	PNMA6A	0	1.59022	0.139	0.029	0
Lipid metabolic type	HDAC11	0	1.07119	0.144	0.034	0
Lipid metabolic type	SOD3	0	1.99539	0.159	0.051	0
Lipid metabolic type	HOXC10	0	1.01822	0.152	0.044	0
Lipid metabolic type	SHISA4	0	1.14213	0.143	0.035	0
Lipid metabolic type	EXOC3-AS1	0	1.00805	0.139	0.032	0
Lipid metabolic type	AC109322.1	0	1.61134	0.13	0.023	0
Lipid metabolic type	FOXD1	0	1.03739	0.153	0.046	0
Lipid metabolic type	COPZ2	0	1.1671	0.156	0.049	0
Lipid metabolic type	DBNDD1	0	1.63194	0.132	0.026	0
Lipid metabolic type	RBP7	0	1.72975	0.153	0.048	0
Lipid metabolic type	CCN3	0	1.11707	0.151	0.046	0
Lipid metabolic type	TTC39A	0	1.38482	0.127	0.023	0
Lipid metabolic type	TOM1L1	0	1.05779	0.137	0.033	0
Lipid metabolic type	LINC01315	0	1.43115	0.128	0.024	0
Lipid metabolic type	C10orf90	0	1.60002	0.124	0.02	0
Lipid metabolic type	SEPTIN3	0	1.18986	0.141	0.037	0
Lipid metabolic type	HEXIM2	0	1.1867	0.132	0.03	0
Lipid metabolic type	AC008443.5	0	1.11971	0.129	0.028	0
Lipid metabolic type	ADM	0	1.09014	0.155	0.054	0
Lipid metabolic type	DSP	0	1.30726	0.138	0.038	0
Lipid metabolic type	USP54	0	1.00528	0.13	0.03	0
Lipid metabolic type	ARHGAP5-AS1	0	1.23856	0.13	0.03	0
Lipid metabolic type	HOXD8	0	1.05492	0.137	0.038	0
Lipid metabolic type	AL035541.1	0	2.58393	0.109	0.011	0
Lipid metabolic type	KCNN2	0	1.58412	0.112	0.015	0
Lipid metabolic type	OAF	0	1.10835	0.136	0.039	0
Lipid metabolic type	CYGB	0	1.93778	0.119	0.022	0
Lipid metabolic type	GAPLINC	0	1.59763	0.117	0.02	0
Lipid metabolic type	FGFBP2	0	1.66387	0.114	0.018	0
Lipid metabolic type	LINC02099	0	1.16584	0.121	0.025	0
Lipid metabolic type	FXYD6	0	1.29659	0.135	0.039	0
Lipid metabolic type	ELOVL2	0	1.48517	0.141	0.045	0
Lipid metabolic type	EXTL1	0	1.04914	0.126	0.031	0
Lipid metabolic type	ITGA7	0	1.22521	0.118	0.023	0
Lipid metabolic type	LGALSL	0	1.09686	0.129	0.035	0
Lipid metabolic type	FNTB	0	1.12181	0.124	0.031	0
Lipid metabolic type	NME5	0	1.78214	0.108	0.016	0
Lipid metabolic type	VGF	0	1.11723	0.134	0.042	0
Lipid metabolic type	AL162231.1	0	1.05644	0.125	0.033	0
Lipid metabolic type	SLC22A17	0	1.25428	0.124	0.032	0
Lipid metabolic type	EN2	0	1.06961	0.125	0.034	0
Lipid metabolic type	MAGEA12	0	1.44042	0.119	0.028	0
Lipid metabolic type	LURAP1	0	1.47729	0.11	0.02	0
Lipid metabolic type	SLC6A17	0	1.66875	0.112	0.023	0
Lipid metabolic type	HLA-G	0	1.58638	0.119	0.03	0
Lipid metabolic type	TYRP1	0	1.74874	0.118	0.029	0
Lipid metabolic type	COX6A2	0	1.88226	0.114	0.025	0
Lipid metabolic type	ATP1B2	0	1.49305	0.127	0.038	0
Lipid metabolic type	AC068888.1	0	1.05026	0.117	0.029	0
Lipid metabolic type	BAALC	0	1.81934	0.124	0.036	0
Lipid metabolic type	CDKL3	0	1.14851	0.114	0.027	0
Lipid metabolic type	PTGDS	0	1.11765	0.135	0.048	0
Lipid metabolic type	KCNS3	0	2.04344	0.102	0.015	0
Lipid metabolic type	MCHR1	0	2.24787	0.097	0.011	0
Lipid metabolic type	HOXD1	0	1.83178	0.109	0.023	0
Lipid metabolic type	MEGF10	0	1.28737	0.123	0.037	0
Lipid metabolic type	CTAG2	0	1.66425	0.12	0.034	0
Lipid metabolic type	ETNK2	0	1.0395	0.115	0.03	0
Lipid metabolic type	IL17RE	0	1.00146	0.115	0.03	0
Lipid metabolic type	TTC8	0	1.10286	0.111	0.026	0
Lipid metabolic type	MSX1	0	1.47504	0.109	0.024	0
Lipid metabolic type	PARD6G-AS1	0	1.40388	0.107	0.022	0
Lipid metabolic type	SHC2	0	1.16188	0.11	0.025	0
Lipid metabolic type	RLBP1	0	1.3158	0.114	0.03	0
Lipid metabolic type	LOXL4	0	1.49711	0.12	0.036	0
Lipid metabolic type	MAGEA3	0	1.68483	0.106	0.022	0
Lipid metabolic type	OSGIN1	0	1.54507	0.103	0.02	0
Lipid metabolic type	AL034376.1	0	1.81396	0.099	0.017	0
Lipid metabolic type	AK4	0	1.28897	0.106	0.024	0
Lipid metabolic type	HEY2	0	1.11371	0.11	0.029	0
Lipid metabolic type	ALDH1B1	0	1.11101	0.111	0.03	0
Lipid metabolic type	TTYH1	0	1.4212	0.109	0.028	0
Lipid metabolic type	AL162457.2	0	1.88359	0.097	0.016	0
Lipid metabolic type	CNIH3	0	1.28372	0.106	0.025	0
Lipid metabolic type	LINC01198	0	1.11664	0.111	0.031	0
Lipid metabolic type	ASPHD1	0	1.50842	0.096	0.017	0
Lipid metabolic type	SNTB1	0	1.14354	0.12	0.041	0
Lipid metabolic type	FITM2	0	1.00699	0.103	0.024	0
Lipid metabolic type	TTR	0	1.48902	0.097	0.019	0
Lipid metabolic type	ANG	0	1.11723	0.102	0.024	0
Lipid metabolic type	LINC01531	0	1.32771	0.102	0.024	0
Lipid metabolic type	SRXN1	0	1.22305	0.1	0.023	0
Lipid metabolic type	LNP1	0	1.13846	0.108	0.031	0
Lipid metabolic type	ATP10B	0	1.7914	0.092	0.015	0
Lipid metabolic type	FABP7	0	1.95719	0.098	0.021	0
Lipid metabolic type	SPTY2D1OS	0	1.13997	0.095	0.018	0
Lipid metabolic type	FGF13	0	1.24914	0.099	0.023	0
Lipid metabolic type	PPARGC1A	0	1.21569	0.104	0.028	0
Lipid metabolic type	MAGEA6	0	1.70584	0.092	0.016	0
Lipid metabolic type	SLC44A3	0	1.82835	0.091	0.016	0
Lipid metabolic type	PCAT6	0	1.12645	0.094	0.019	0
Lipid metabolic type	SYT14	0	1.76537	0.088	0.013	0
Lipid metabolic type	TFAP2A-AS1	0	1.02262	0.098	0.024	0
Lipid metabolic type	PMP2	0	2.10234	0.083	0.009	0
Lipid metabolic type	FSTL3	0	1.15233	0.099	0.025	0
Lipid metabolic type	KIF6	0	1.89072	0.086	0.012	0
Lipid metabolic type	AC108488.1	0	1.05556	0.098	0.025	0
Lipid metabolic type	CORO2B	0	1.38443	0.096	0.023	0
Lipid metabolic type	DUSP15	0	1.3129	0.095	0.022	0
Lipid metabolic type	TMEM17	0	1.45764	0.091	0.018	0
Lipid metabolic type	CA8	0	1.6651	0.089	0.016	0
Lipid metabolic type	TMEM229B	0	1.17257	0.091	0.018	0
Lipid metabolic type	OR7A5	0	2.09732	0.081	0.009	0
Lipid metabolic type	TF	0	1.9196	0.093	0.021	0
Lipid metabolic type	ECHDC3	0	1.24317	0.093	0.022	0
Lipid metabolic type	HAGLR	0	1.3194	0.095	0.025	0
Lipid metabolic type	ADGRG6	0	1.42604	0.1	0.03	0
Lipid metabolic type	ST7-AS1	0	1.06122	0.093	0.023	0
Lipid metabolic type	RBPMS-AS1	0	1.80236	0.082	0.012	0
Lipid metabolic type	SCGB1D2	0	2.05975	0.082	0.012	0
Lipid metabolic type	KLHL35	0	1.06827	0.096	0.026	0
Lipid metabolic type	CTXN1	0	1.12465	0.103	0.033	0
Lipid metabolic type	POPDC3	0	1.3086	0.095	0.026	0
Lipid metabolic type	PKNOX2	0	1.01063	0.092	0.023	0
Lipid metabolic type	SERINC2	0	1.41635	0.095	0.027	0
Lipid metabolic type	MAPRE3	0	1.14489	0.09	0.022	0
Lipid metabolic type	SLC7A2	0	1.36233	0.093	0.025	0
Lipid metabolic type	MAGEA10	0	1.56291	0.091	0.023	0
Lipid metabolic type	CAPN5	0	1.51758	0.086	0.018	0
Lipid metabolic type	FBXL7	0	1.17686	0.089	0.022	0
Lipid metabolic type	ARC	0	1.20466	0.106	0.039	0
Lipid metabolic type	SORCS1	0	1.38119	0.094	0.027	0
Lipid metabolic type	CMTM5	0	2.53193	0.078	0.011	0
Lipid metabolic type	L3MBTL4	0	1.11831	0.091	0.024	0
Lipid metabolic type	MAPK4	0	1.82319	0.08	0.013	0
Lipid metabolic type	MAG	0	1.87512	0.093	0.026	0
Lipid metabolic type	NRSN2	0	1.03431	0.094	0.027	0
Lipid metabolic type	AL359704.3	0	1.54429	0.081	0.015	0
Lipid metabolic type	GDNF	0	2.51328	0.08	0.014	0
Lipid metabolic type	SPACA9	0	1.03704	0.09	0.024	0
Lipid metabolic type	APOC2	0	1.88491	0.099	0.033	0
Lipid metabolic type	AC046168.2	0	1.43696	0.081	0.016	0
Lipid metabolic type	AC023043.1	0	1.45306	0.081	0.016	0
Lipid metabolic type	EPB41L1	0	1.28674	0.085	0.02	0
Lipid metabolic type	CYB5R2	0	1.31444	0.083	0.019	0
Lipid metabolic type	OR7C1	0	1.78146	0.073	0.009	0
Lipid metabolic type	CST2	0	2.30444	0.078	0.014	0
Lipid metabolic type	MAGEA1	0	1.29722	0.084	0.02	0
Lipid metabolic type	FGF1	0	1.8143	0.071	0.008	0
Lipid metabolic type	EPDR1	0	1.63098	0.08	0.017	0
Lipid metabolic type	AC123777.1	0	1.37404	0.077	0.014	0
Lipid metabolic type	HSPA4L	0	1.23961	0.084	0.022	0
Lipid metabolic type	PSCA	0	2.37283	0.069	0.007	0
Lipid metabolic type	SH3BGR	0	1.02849	0.085	0.023	0
Lipid metabolic type	LINC02482	0	1.04463	0.081	0.019	0
Lipid metabolic type	AC133552.5	0	1.33975	0.077	0.015	0
Lipid metabolic type	CADM4	0	1.33999	0.088	0.026	0
Lipid metabolic type	CXADR	0	1.57402	0.081	0.019	0
Lipid metabolic type	TRIM9	0	1.19035	0.083	0.022	0
Lipid metabolic type	AL139220.2	0	1.22677	0.078	0.017	0
Lipid metabolic type	HOXA5	0	1.5498	0.087	0.026	0
Lipid metabolic type	WIPF3	0	1.573	0.073	0.012	0
Lipid metabolic type	TSKU	0	1.13673	0.082	0.021	0
Lipid metabolic type	ITGB3	0	1.29502	0.079	0.018	0
Lipid metabolic type	PRSS33	0	2.24828	0.069	0.009	0
Lipid metabolic type	CMBL	0	1.34439	0.08	0.02	0
Lipid metabolic type	CPT1C	0	1.67908	0.074	0.014	0
Lipid metabolic type	MAGEC1	0	1.54222	0.078	0.018	0
Lipid metabolic type	L1CAM	0	1.36801	0.078	0.018	0
Lipid metabolic type	WNT4	0	1.58895	0.073	0.014	0
Lipid metabolic type	FOXP4-AS1	0	1.1417	0.078	0.019	0
Lipid metabolic type	FZD9	0	1.21944	0.079	0.021	0
Lipid metabolic type	ST8SIA6	0	1.29108	0.071	0.013	0
Lipid metabolic type	TMTC1	0	1.4535	0.075	0.017	0
Lipid metabolic type	KCNMB4	0	1.6633	0.074	0.016	0
Lipid metabolic type	ZNF280A	0	1.66012	0.068	0.011	0
Lipid metabolic type	LDB3	0	1.53573	0.067	0.01	0
Lipid metabolic type	MMP15	0	1.69573	0.074	0.017	0
Lipid metabolic type	CCDC68	0	1.81961	0.072	0.015	0
Lipid metabolic type	BFSP1	0	1.55833	0.071	0.014	0
Lipid metabolic type	AL121820.2	0	1.39395	0.068	0.012	0
Lipid metabolic type	LINC02289	0	2.04353	0.067	0.011	0
Lipid metabolic type	AC015922.3	0	1.70447	0.07	0.014	0
Lipid metabolic type	PTPRF	0	1.06429	0.08	0.024	0
Lipid metabolic type	THBS2	0	1.54148	0.079	0.023	0
Lipid metabolic type	TNNT1	0	1.57063	0.075	0.019	0
Lipid metabolic type	NAT8L	0	1.34417	0.066	0.011	0
Lipid metabolic type	PNMA2	0	1.53994	0.069	0.014	0
Lipid metabolic type	HOXB8	0	1.73733	0.07	0.015	0
Lipid metabolic type	FABP3	0	1.15828	0.075	0.02	0
Lipid metabolic type	ADRA2C	0	1.43348	0.072	0.017	0
Lipid metabolic type	CHST9	0	1.50747	0.073	0.018	0
Lipid metabolic type	FOXN3-AS1	0	1.18346	0.07	0.016	0
Lipid metabolic type	MAPK8IP2	0	1.30858	0.071	0.017	0
Lipid metabolic type	FAM78B	0	1.06921	0.068	0.015	0
Lipid metabolic type	ABCC11	0	1.29788	0.068	0.015	0
Lipid metabolic type	C1QTNF1	0	1.20356	0.07	0.017	0
Lipid metabolic type	LINC00839	0	1.10831	0.072	0.019	0
Lipid metabolic type	LINC01023	0	1.0273	0.066	0.014	0
Lipid metabolic type	GPRIN1	0	1.28717	0.068	0.016	0
Lipid metabolic type	ADCY1	0	1.16543	0.068	0.016	0
Lipid metabolic type	METTL27	0	1.49932	0.066	0.014	0
Lipid metabolic type	VXN	0	1.21932	0.066	0.014	0
Lipid metabolic type	AC156455.1	0	1.35139	0.069	0.017	0
Lipid metabolic type	GLUD2	0	1.17345	0.065	0.013	0
Lipid metabolic type	PRDM7	0	1.5629	0.06	0.008	0
Lipid metabolic type	HOXC8	0	1.17324	0.072	0.02	0
Lipid metabolic type	PRRT3-AS1	0	1.40363	0.063	0.012	0
Lipid metabolic type	LINC02447	0	1.32585	0.062	0.011	0
Lipid metabolic type	AL590617.2	0	1.30066	0.066	0.015	0
Lipid metabolic type	BNC2-AS1	0	1.08875	0.066	0.015	0
Lipid metabolic type	AC026801.2	0	1.37541	0.061	0.011	0
Lipid metabolic type	LURAP1L	0	1.43388	0.063	0.013	0
Lipid metabolic type	PRTG	0	1.07941	0.067	0.017	0
Lipid metabolic type	AL353138.1	0	1.48545	0.061	0.012	0
Lipid metabolic type	KIAA1549L	0	1.26032	0.062	0.013	0
Lipid metabolic type	ST6GALNAC2	0	1.76661	0.058	0.009	0
Lipid metabolic type	CNDP1	0	2.46028	0.058	0.009	0
Lipid metabolic type	AL139260.1	0	1.05962	0.062	0.014	0
Lipid metabolic type	COL22A1	0	1.95432	0.065	0.017	0
Lipid metabolic type	MAPT	0	1.58272	0.058	0.01	0
Lipid metabolic type	PRCD	0	1.67195	0.06	0.012	0
Lipid metabolic type	FMO4	0	1.02983	0.062	0.015	0
Lipid metabolic type	LINC01366	0	1.46883	0.056	0.009	0
Lipid metabolic type	ELFN1-AS1	0	1.41128	0.062	0.015	0
Lipid metabolic type	SLC26A4	0	1.46585	0.061	0.014	0
Lipid metabolic type	FBXO16	0	1.51281	0.059	0.012	0
Lipid metabolic type	TP53TG3D	0	1.25743	0.058	0.011	0
Lipid metabolic type	SHROOM2	0	1.55603	0.059	0.012	0
Lipid metabolic type	CDO1	0	1.57323	0.055	0.009	0
Lipid metabolic type	LINC00589	0	2.08802	0.052	0.006	0
Lipid metabolic type	LINC01474	0	1.82577	0.052	0.006	0
Lipid metabolic type	KCNC2	0	2.12553	0.057	0.011	0
Lipid metabolic type	CPEB1	0	1.37698	0.057	0.011	0
Lipid metabolic type	MYO5B	0	1.79233	0.055	0.009	0
Lipid metabolic type	C19orf81	0	1.52433	0.057	0.011	0
Lipid metabolic type	HHATL	0	2.73614	0.052	0.008	0
Lipid metabolic type	CADPS	0	1.6373	0.052	0.008	0
Lipid metabolic type	YPEL4	0	1.28266	0.055	0.011	0
Lipid metabolic type	ASPA	0	1.4298	0.052	0.008	0
Lipid metabolic type	AC007325.4	0	1.58156	0.052	0.008	0
Lipid metabolic type	SUSD5	0	1.42407	0.053	0.01	0
Lipid metabolic type	RAB3C	0	1.80609	0.051	0.008	0
Lipid metabolic type	AC011294.1	0	2.32893	0.051	0.008	0
Lipid metabolic type	FAM86C1	0	1.12484	0.053	0.01	0
Lipid metabolic type	NEURL2	0	1.57443	0.052	0.01	0
Lipid metabolic type	LRRC39	0	1.6185	0.05	0.009	0
Lipid metabolic type	TRIM51	0	1.74939	0.048	0.007	0
Lipid metabolic type	GPC4	0	1.97392	0.05	0.009	0
Lipid metabolic type	SLITRK2	0	1.55635	0.051	0.01	0
Lipid metabolic type	UGT2B7	0	2.45354	0.045	0.005	0
Lipid metabolic type	AF279873.3	0	1.8676	0.048	0.008	0
Lipid metabolic type	SLC7A4	0	2.00005	0.049	0.009	0
Lipid metabolic type	PAGE2	0	2.15412	0.048	0.008	0
Lipid metabolic type	AC010967.1	0	2.2551	0.044	0.004	0
Lipid metabolic type	BMP8B	0	2.047	0.043	0.006	0
Lipid metabolic type	AC007405.3	0	1.8559	0.044	0.007	0
Lipid metabolic type	PAGE2B	0	2.11169	0.039	0.005	0
Lipid metabolic type	AC016705.2	8.07871e-308	1.23512	0.056	0.012	1.15396e-303
Lipid metabolic type	MLIP	1.14122e-307	1.37418	0.049	0.009	1.63012e-303
Lipid metabolic type	LY6E-DT	3.98444e-307	1.32068	0.055	0.012	5.69137e-303
Lipid metabolic type	ADAM23	2.49353e-306	1.19112	0.073	0.021	3.56177e-302
Lipid metabolic type	UFSP1	1.84718e-304	1.4	0.052	0.01	2.63851e-300
Lipid metabolic type	WFDC1	2.16623e-303	1.29757	0.072	0.02	3.09425e-299
Lipid metabolic type	LGI3	7.22607e-301	1.84162	0.044	0.007	1.03217e-296
Lipid metabolic type	GPR158	5.78371e-299	1.37882	0.054	0.012	8.26146e-295
Lipid metabolic type	TRIM58	6.00834e-299	1.65239	0.049	0.01	8.58231e-295
Lipid metabolic type	EGR4	3.05201e-297	1.47885	0.047	0.009	4.35949e-293
Lipid metabolic type	MAGEA4	3.39836e-296	1.67189	0.068	0.019	4.85422e-292
Lipid metabolic type	PCDHB4	5.79227e-296	1.73217	0.041	0.006	8.27368e-292
Lipid metabolic type	AL136298.1	6.01288e-295	2.26306	0.035	0.004	8.58879e-291
Lipid metabolic type	LINC02552	3.73635e-293	2.14141	0.042	0.007	5.337e-289
Lipid metabolic type	PCDH1	4.5004e-293	1.14058	0.064	0.017	6.42838e-289
Lipid metabolic type	HAS2-AS1	6.85642e-293	1.55941	0.045	0.008	9.79371e-289
Lipid metabolic type	C1orf53	1.39375e-290	1.0372	0.067	0.019	1.99084e-286
Lipid metabolic type	CTNNA2	3.57508e-290	1.91167	0.04	0.006	5.10665e-286
Lipid metabolic type	LINGO1	4.45656e-290	1.4107	0.065	0.018	6.36575e-286
Lipid metabolic type	FZD5	4.97239e-290	1.07031	0.073	0.022	7.10256e-286
Lipid metabolic type	HAP1	1.48096e-289	1.01783	0.056	0.013	2.11541e-285
Lipid metabolic type	PADI2	3.36121e-289	1.37973	0.064	0.017	4.80115e-285
Lipid metabolic type	MORN4	4.97322e-288	1.43498	0.049	0.01	7.10375e-284
Lipid metabolic type	LINC01484	8.74579e-287	1.73368	0.036	0.004	1.24925e-282
Lipid metabolic type	CHSY3	9.7806e-287	1.09834	0.055	0.013	1.39706e-282
Lipid metabolic type	BOK	1.20863e-285	1.45193	0.045	0.008	1.7264e-281
Lipid metabolic type	LAMA1	1.94468e-285	1.00851	0.065	0.018	2.77779e-281
Lipid metabolic type	PTCHD4	4.75198e-285	1.82991	0.045	0.008	6.78773e-281
Lipid metabolic type	SLC35F1	5.41815e-285	1.69147	0.048	0.01	7.73929e-281
Lipid metabolic type	MANEAL	1.5249e-284	1.29636	0.049	0.01	2.17816e-280
Lipid metabolic type	GJB2	1.55088e-284	1.6802	0.058	0.015	2.21528e-280
Lipid metabolic type	LBX2-AS1	1.81335e-284	1.35561	0.049	0.01	2.59018e-280
Lipid metabolic type	MYCNUT	1.35162e-283	2.44405	0.03	0.002	1.93065e-279
Lipid metabolic type	ZNF536	3.77256e-283	2.3485	0.043	0.007	5.38873e-279
Lipid metabolic type	PCDHB16	5.24579e-283	1.26648	0.048	0.01	7.49308e-279
Lipid metabolic type	EDA2R	1.25723e-281	1.37549	0.044	0.008	1.79583e-277
Lipid metabolic type	UBAC2-AS1	3.1315e-281	1.0295	0.056	0.013	4.47303e-277
Lipid metabolic type	MMEL1	9.49731e-281	1.20265	0.046	0.009	1.3566e-276
Lipid metabolic type	SAMD13	1.65708e-280	1.08116	0.069	0.02	2.36697e-276
Lipid metabolic type	PCSK2	1.66669e-279	1.82349	0.041	0.007	2.3807e-275
Lipid metabolic type	SATB2-AS1	1.9312e-279	1.20625	0.052	0.011	2.75853e-275
Lipid metabolic type	REEP6	3.64377e-279	1.04594	0.053	0.012	5.20476e-275
Lipid metabolic type	SCG2	9.29614e-278	1.86173	0.055	0.013	1.32786e-273
Lipid metabolic type	SERPINA5	1.51403e-276	2.10922	0.046	0.009	2.16264e-272
Lipid metabolic type	KRTAP19-1	7.57147e-273	1.68122	0.057	0.014	1.08151e-268
Lipid metabolic type	NFASC	1.69304e-272	1.01044	0.06	0.016	2.41834e-268
Lipid metabolic type	OLIG2	1.88411e-272	1.96908	0.036	0.005	2.69126e-268
Lipid metabolic type	CCDC113	2.91327e-271	1.33797	0.045	0.009	4.16132e-267
Lipid metabolic type	CLIP3	2.78214e-269	1.09514	0.064	0.018	3.974e-265
Lipid metabolic type	KCNK15-AS1	4.27329e-269	1.74605	0.035	0.005	6.10397e-265
Lipid metabolic type	AL078590.2	5.37001e-268	1.03832	0.048	0.01	7.67053e-264
Lipid metabolic type	ABLIM3	7.04439e-268	1.37336	0.042	0.008	1.00622e-263
Lipid metabolic type	AC025419.1	2.29384e-266	1.64186	0.034	0.004	3.27652e-262
Lipid metabolic type	AC009549.1	3.32987e-266	1.44226	0.041	0.007	4.75638e-262
Lipid metabolic type	ABCA9	3.45805e-266	1.37467	0.046	0.009	4.93948e-262
Lipid metabolic type	GAD1	6.31973e-263	1.86132	0.037	0.006	9.02711e-259
Lipid metabolic type	ADGRB1	7.2175e-263	1.14639	0.064	0.019	1.03095e-258
Lipid metabolic type	LINC02732	2.18984e-261	1.99359	0.038	0.006	3.12796e-257
Lipid metabolic type	FGF9	2.4908e-260	1.18503	0.057	0.015	3.55787e-256
Lipid metabolic type	GJC3	4.98256e-260	1.55376	0.043	0.008	7.11709e-256
Lipid metabolic type	AC008966.1	1.08548e-258	1.1169	0.048	0.011	1.5505e-254
Lipid metabolic type	PSG9	1.49846e-257	2.56791	0.03	0.003	2.14039e-253
Lipid metabolic type	BDNF	1.06961e-254	1.05795	0.048	0.011	1.52783e-250
Lipid metabolic type	AGMO	5.69725e-254	1.20375	0.08	0.029	8.13795e-250
Lipid metabolic type	LYPD1	6.3874e-251	1.20498	0.049	0.012	9.12377e-247
Lipid metabolic type	AC007611.1	1.95356e-249	1.37708	0.039	0.007	2.79046e-245
Lipid metabolic type	PPM1H	7.62586e-247	1.11374	0.052	0.013	1.08928e-242
Lipid metabolic type	MAGEC2	1.10847e-246	1.04625	0.072	0.024	1.58334e-242
Lipid metabolic type	BEX1	2.53156e-246	1.49768	0.071	0.024	3.61607e-242
Lipid metabolic type	LIN7A	1.81362e-245	1.65301	0.044	0.009	2.59057e-241
Lipid metabolic type	MAGEA11	7.17865e-245	1.63788	0.039	0.007	1.0254e-240
Lipid metabolic type	SRRM3	8.97148e-245	1.16199	0.064	0.02	1.28149e-240
Lipid metabolic type	B3GALT1	4.91597e-242	1.71784	0.038	0.007	7.02198e-238
Lipid metabolic type	ME1	7.71529e-241	1.15485	0.055	0.015	1.10205e-236
Lipid metabolic type	PFKFB4	5.94718e-240	1.12065	0.049	0.012	8.49495e-236
Lipid metabolic type	AC006942.1	6.12126e-240	1.16732	0.041	0.008	8.74361e-236
Lipid metabolic type	FLRT3	6.64035e-240	1.50778	0.055	0.015	9.48508e-236
Lipid metabolic type	ASTN2	1.0879e-239	1.01171	0.05	0.012	1.55396e-235
Lipid metabolic type	AL358334.2	2.09457e-238	1.5615	0.03	0.004	2.99189e-234
Lipid metabolic type	KREMEN2	1.36054e-237	1.53025	0.041	0.009	1.94339e-233
Lipid metabolic type	HTR2B	2.74406e-236	1.03238	0.054	0.015	3.91961e-232
Lipid metabolic type	ADGRD1	6.02678e-235	1.23387	0.048	0.012	8.60865e-231
Lipid metabolic type	ADRB1	8.3797e-235	1.66476	0.046	0.011	1.19696e-230
Lipid metabolic type	Z97205.2	8.82972e-235	1.00582	0.045	0.01	1.26124e-230
Lipid metabolic type	TMEM178B	1.85594e-234	1.7273	0.05	0.013	2.65103e-230
Lipid metabolic type	AC126773.4	9.67815e-233	1.02566	0.04	0.008	1.38243e-228
Lipid metabolic type	CCDC140	1.14579e-232	1.37609	0.039	0.008	1.63665e-228
Lipid metabolic type	FAM180B	2.4491e-229	1.84028	0.029	0.004	3.4983e-225
Lipid metabolic type	SOX2-OT	2.50342e-229	1.45012	0.059	0.018	3.57588e-225
Lipid metabolic type	TLCD1	1.05618e-228	1.15046	0.047	0.012	1.50864e-224
Lipid metabolic type	TSPAN19	2.28727e-228	1.52468	0.042	0.009	3.26714e-224
Lipid metabolic type	KIF17	3.22233e-227	1.24528	0.046	0.011	4.60277e-223
Lipid metabolic type	ESPN	2.06803e-226	1.79941	0.038	0.008	2.95398e-222
Lipid metabolic type	CHADL	1.43045e-224	1.48041	0.044	0.011	2.04325e-220
Lipid metabolic type	AL096706.1	2.80678e-223	1.89665	0.035	0.006	4.0092e-219
Lipid metabolic type	AL357146.1	8.58235e-221	1.89824	0.029	0.004	1.2259e-216
Lipid metabolic type	LINC01436	1.17594e-220	1.33075	0.049	0.013	1.67972e-216
Lipid metabolic type	HSPB8	1.015e-219	1.75633	0.032	0.005	1.44982e-215
Lipid metabolic type	CDH6	1.28451e-219	2.06423	0.051	0.014	1.8348e-215
Lipid metabolic type	ZFP57	1.63564e-219	1.27357	0.044	0.011	2.33635e-215
Lipid metabolic type	CCNO	1.61689e-217	1.06761	0.049	0.013	2.30956e-213
Lipid metabolic type	NTN4	2.70302e-217	1.03384	0.041	0.009	3.861e-213
Lipid metabolic type	RND2	8.1524e-216	1.50711	0.04	0.009	1.16449e-211
Lipid metabolic type	PCDH20	3.17159e-215	1.84062	0.036	0.007	4.5303e-211
Lipid metabolic type	ITIH6	3.17821e-215	1.94838	0.035	0.006	4.53975e-211
Lipid metabolic type	AL360169.3	1.75917e-213	1.56385	0.031	0.005	2.5128e-209
Lipid metabolic type	PCOTH	5.45639e-211	1.11932	0.044	0.011	7.79391e-207
Lipid metabolic type	ATP6V0A4	5.89446e-210	1.62825	0.03	0.005	8.41965e-206
Lipid metabolic type	P2RX6	1.34454e-209	1.77091	0.029	0.004	1.92054e-205
Lipid metabolic type	LINC00853	4.35122e-209	1.97948	0.027	0.004	6.21529e-205
Lipid metabolic type	CTXND1	7.9588e-208	2.50185	0.026	0.003	1.13683e-203
Lipid metabolic type	TMPRSS13	1.75385e-207	1.42919	0.038	0.008	2.5052e-203
Lipid metabolic type	HCCAT5	3.81477e-207	1.54193	0.032	0.006	5.44901e-203
Lipid metabolic type	AC010503.1	3.37244e-206	1.25207	0.032	0.006	4.8172e-202
Lipid metabolic type	ANGPTL7	1.43572e-205	1.27417	0.048	0.014	2.05078e-201
Lipid metabolic type	C11orf91	1.02018e-204	1.73871	0.029	0.005	1.45723e-200
Lipid metabolic type	TSLP	4.55905e-204	1.80505	0.026	0.003	6.51215e-200
Lipid metabolic type	AC064829.1	4.76498e-204	1.31783	0.028	0.004	6.80629e-200
Lipid metabolic type	RNF180	9.72392e-204	1.25854	0.039	0.009	1.38897e-199
Lipid metabolic type	AC055807.1	1.80168e-203	1.89497	0.028	0.004	2.57352e-199
Lipid metabolic type	TGFB2	2.55973e-203	1.4676	0.06	0.02	3.65632e-199
Lipid metabolic type	ASIP	2.10944e-202	1.61623	0.03	0.005	3.01313e-198
Lipid metabolic type	LINC02550	2.01321e-200	1.35562	0.037	0.008	2.87567e-196
Lipid metabolic type	HOGA1	2.63231e-199	2.07938	0.025	0.003	3.75999e-195
Lipid metabolic type	ALK	5.07246e-196	1.92128	0.026	0.004	7.24551e-192
Lipid metabolic type	LINC00221	1.79855e-194	1.10291	0.051	0.015	2.56905e-190
Lipid metabolic type	EHD3	2.05107e-194	1.25514	0.042	0.011	2.92975e-190
Lipid metabolic type	GSTA3	2.60448e-194	2.30986	0.027	0.004	3.72024e-190
Lipid metabolic type	AC006058.3	9.01382e-194	1.08999	0.032	0.006	1.28753e-189
Lipid metabolic type	AC023824.3	3.55627e-193	1.8583	0.026	0.004	5.07977e-189
Lipid metabolic type	AL139002.1	4.96714e-193	2.04361	0.026	0.004	7.09506e-189
Lipid metabolic type	AL390755.1	5.81451e-193	2.14921	0.029	0.005	8.30544e-189
Lipid metabolic type	LINC00520	6.56144e-193	1.67462	0.038	0.009	9.37236e-189
Lipid metabolic type	SNTG1	4.63584e-192	1.35451	0.047	0.014	6.62183e-188
Lipid metabolic type	AC104667.2	1.40121e-191	1.32293	0.032	0.006	2.00149e-187
Lipid metabolic type	ASB4	3.1381e-191	1.73149	0.034	0.007	4.48246e-187
Lipid metabolic type	HAND2	2.58518e-190	1.58467	0.073	0.029	3.69267e-186
Lipid metabolic type	GATA4	1.17061e-189	1.76319	0.039	0.01	1.6721e-185
Lipid metabolic type	TMEM171	1.29945e-189	2.18758	0.023	0.003	1.85614e-185
Lipid metabolic type	PERM1	1.07573e-188	1.81433	0.03	0.005	1.53658e-184
Lipid metabolic type	RDH8	1.64799e-188	1.21371	0.036	0.008	2.35399e-184
Lipid metabolic type	BATF2	1.93084e-188	1.33615	0.037	0.009	2.75801e-184
Lipid metabolic type	FAM133A	5.39878e-188	1.1434	0.036	0.008	7.71162e-184
Lipid metabolic type	RELN	1.22969e-187	1.51361	0.037	0.009	1.75649e-183
Lipid metabolic type	CTNND2	1.54365e-187	1.69202	0.039	0.01	2.20495e-183
Lipid metabolic type	FRMD5	2.48418e-187	1.42453	0.037	0.009	3.5484e-183
Lipid metabolic type	ZFPM2-AS1	2.93913e-187	1.11687	0.04	0.01	4.19825e-183
Lipid metabolic type	NKAIN4	1.70066e-185	1.77873	0.045	0.013	2.42922e-181
Lipid metabolic type	AP001830.1	1.06896e-184	1.01812	0.028	0.005	1.5269e-180
Lipid metabolic type	LINC01762	5.67849e-184	1.86292	0.026	0.004	8.11115e-180
Lipid metabolic type	LINC02454	6.37927e-184	1.92707	0.024	0.003	9.11215e-180
Lipid metabolic type	AC010894.3	1.28752e-183	1.40229	0.031	0.006	1.83909e-179
Lipid metabolic type	HCN1	1.37352e-183	1.47991	0.028	0.005	1.96194e-179
Lipid metabolic type	APCDD1	2.6271e-183	1.30162	0.029	0.005	3.75255e-179
Lipid metabolic type	PCDHB2	4.26424e-183	1.19798	0.043	0.012	6.09104e-179
Lipid metabolic type	TRIM6	1.2712e-182	1.01486	0.035	0.008	1.81579e-178
Lipid metabolic type	KCNH2	1.35444e-182	1.51599	0.038	0.01	1.93468e-178
Lipid metabolic type	ZNF396	1.41977e-182	1.10813	0.031	0.006	2.028e-178
Lipid metabolic type	PMFBP1	1.20261e-181	1.48052	0.026	0.004	1.7178e-177
Lipid metabolic type	ZP3	6.08624e-181	1.11445	0.044	0.013	8.69358e-177
Lipid metabolic type	AMHR2	1.75831e-180	1.68017	0.034	0.008	2.51158e-176
Lipid metabolic type	SERTM2	2.70285e-180	1.04381	0.05	0.016	3.86075e-176
Lipid metabolic type	AC005144.1	2.76496e-180	1.44916	0.026	0.004	3.94947e-176
Lipid metabolic type	PHOX2B	6.79003e-180	2.07794	0.035	0.008	9.69888e-176
Lipid metabolic type	PLCD3	3.06517e-179	1.16117	0.04	0.011	4.37829e-175
Lipid metabolic type	LRRTM2	1.02121e-178	1.37405	0.045	0.014	1.45869e-174
Lipid metabolic type	FAM86B1	1.82708e-178	1.26014	0.031	0.007	2.60979e-174
Lipid metabolic type	FADS2	4.63693e-178	1.0807	0.061	0.023	6.62339e-174
Lipid metabolic type	C1GALT1C1L	5.83966e-178	1.30575	0.029	0.006	8.34136e-174
Lipid metabolic type	GRIN2A	6.02874e-177	2.31104	0.029	0.005	8.61146e-173
Lipid metabolic type	FAM124A	1.14478e-176	1.16493	0.038	0.01	1.63521e-172
Lipid metabolic type	DMRT2	2.57778e-175	1.28684	0.036	0.009	3.68211e-171
Lipid metabolic type	PANX2	9.19619e-175	1.4323	0.03	0.006	1.31358e-170
Lipid metabolic type	MAPK8IP1	1.29384e-174	1.01987	0.043	0.013	1.84812e-170
Lipid metabolic type	LINC01361	6.20237e-174	2.67946	0.024	0.004	8.85947e-170
Lipid metabolic type	SPINT1-AS1	8.34697e-174	1.11607	0.037	0.009	1.19228e-169
Lipid metabolic type	RBAKDN	1.28664e-173	1.29427	0.029	0.006	1.83783e-169
Lipid metabolic type	ILDR2	3.25532e-173	1.04301	0.036	0.009	4.6499e-169
Lipid metabolic type	TRIM17	4.66698e-173	1.49433	0.028	0.005	6.66632e-169
Lipid metabolic type	AC044781.1	6.8693e-173	1.0539	0.029	0.006	9.81211e-169
Lipid metabolic type	CGREF1	1.00012e-172	1.19145	0.038	0.01	1.42857e-168
Lipid metabolic type	FMN2	1.32864e-172	1.26085	0.034	0.008	1.89783e-168
Lipid metabolic type	AC079848.1	1.90815e-172	1.11936	0.032	0.007	2.7256e-168
Lipid metabolic type	RASD2	5.16692e-172	1.32386	0.028	0.005	7.38042e-168
Lipid metabolic type	KRBOX1	3.2194e-171	1.18636	0.025	0.004	4.59859e-167
Lipid metabolic type	AC136616.1	1.67675e-170	1.23849	0.034	0.008	2.39507e-166
Lipid metabolic type	RAB3B	1.70613e-170	1.52088	0.038	0.01	2.43703e-166
Lipid metabolic type	AL606760.1	3.89678e-170	1.15679	0.033	0.008	5.56617e-166
Lipid metabolic type	CCDC110	6.06532e-170	1.17027	0.032	0.007	8.6637e-166
Lipid metabolic type	ADARB2	1.0778e-168	1.4498	0.029	0.006	1.53953e-164
Lipid metabolic type	TUB	4.32987e-168	1.01743	0.038	0.01	6.18479e-164
Lipid metabolic type	TMEM132D-AS1	2.07677e-166	2.14395	0.026	0.005	2.96646e-162
Lipid metabolic type	UNC80	2.09687e-166	1.42712	0.028	0.006	2.99517e-162
Lipid metabolic type	COL9A1	7.88769e-166	1.13685	0.036	0.009	1.12668e-161
Lipid metabolic type	AC002470.1	1.11298e-165	1.22878	0.029	0.006	1.58979e-161
Lipid metabolic type	NRXN2	1.24309e-165	1.1039	0.056	0.021	1.77562e-161
Lipid metabolic type	NKAIN3	2.17947e-165	1.07311	0.046	0.015	3.11315e-161
Lipid metabolic type	KIF1A	1.48598e-164	1.41176	0.033	0.008	2.12257e-160
Lipid metabolic type	CCDC169	2.65335e-164	1.1672	0.032	0.007	3.79005e-160
Lipid metabolic type	ADORA2B	6.5292e-162	1.31538	0.035	0.009	9.32631e-158
Lipid metabolic type	SEMA3D	2.0953e-161	1.00272	0.034	0.009	2.99293e-157
Lipid metabolic type	TCN1	3.24119e-159	2.01292	0.03	0.007	4.62972e-155
Lipid metabolic type	LDHD	1.77029e-158	1.32797	0.026	0.005	2.52869e-154
Lipid metabolic type	C2CD4D	2.11639e-158	1.16414	0.034	0.009	3.02305e-154
Lipid metabolic type	LINC02620	5.61168e-158	1.30403	0.026	0.005	8.01572e-154
Lipid metabolic type	ARHGEF26-AS1	1.37732e-156	1.0514	0.029	0.007	1.96736e-152
Lipid metabolic type	GABRB3	1.51362e-156	1.05364	0.044	0.014	2.16206e-152
Lipid metabolic type	CLDN11	3.16213e-155	1.74961	0.028	0.006	4.51679e-151
Lipid metabolic type	TMEM200C	1.48611e-154	1.48927	0.034	0.009	2.12276e-150
Lipid metabolic type	AC138696.2	1.89309e-154	1.03376	0.036	0.01	2.70409e-150
Lipid metabolic type	SLC5A4	3.8483e-154	1.48569	0.031	0.007	5.49691e-150
Lipid metabolic type	AC021242.3	1.02657e-151	1.02136	0.031	0.008	1.46635e-147
Lipid metabolic type	COL20A1	4.91246e-151	1.76513	0.034	0.009	7.01696e-147
Lipid metabolic type	IDH1-AS1	1.25196e-150	1.27535	0.024	0.004	1.7883e-146
Lipid metabolic type	NAMA	4.90203e-149	1.46547	0.028	0.006	7.00206e-145
Lipid metabolic type	LINC01579	5.11892e-149	1.12143	0.029	0.007	7.31187e-145
Lipid metabolic type	SCG3	6.42787e-149	1.89415	0.029	0.007	9.18156e-145
Lipid metabolic type	KCNJ10	7.03123e-149	1.29494	0.029	0.007	1.00434e-144
Lipid metabolic type	GRIK3	1.4687e-148	1.36258	0.041	0.013	2.09789e-144
Lipid metabolic type	LINC00598	1.94855e-148	1.03746	0.036	0.011	2.78331e-144
Lipid metabolic type	STK32A-AS1	1.14745e-147	1.18776	0.023	0.004	1.63902e-143
Lipid metabolic type	HSPB7	1.61292e-147	1.65338	0.026	0.006	2.30389e-143
Lipid metabolic type	SLC25A21-AS1	1.28989e-145	1.42501	0.028	0.007	1.84248e-141
Lipid metabolic type	AC027682.6	6.21313e-145	1.00368	0.027	0.006	8.87483e-141
Lipid metabolic type	AC107871.2	1.00705e-143	1.18901	0.025	0.005	1.43847e-139
Lipid metabolic type	INSC	2.46786e-143	1.34183	0.023	0.004	3.5251e-139
Lipid metabolic type	LBX2	6.42144e-143	1.3249	0.026	0.006	9.17239e-139
Lipid metabolic type	CNNM1	1.15842e-142	1.34715	0.025	0.005	1.65468e-138
Lipid metabolic type	NHLRC1	2.59917e-142	1.04004	0.029	0.007	3.71266e-138
Lipid metabolic type	AC105046.1	4.18753e-142	1.00057	0.031	0.008	5.98147e-138
Lipid metabolic type	LRGUK	4.80297e-142	1.13838	0.029	0.007	6.86057e-138
Lipid metabolic type	PAQR6	1.79902e-141	1.08832	0.035	0.01	2.56972e-137
Lipid metabolic type	CCDC181	3.7619e-140	1.12002	0.034	0.01	5.37349e-136
Lipid metabolic type	CES1	8.6311e-140	1.03199	0.039	0.013	1.23287e-135
Lipid metabolic type	TRPM2-AS	4.11933e-139	1.7079	0.023	0.005	5.88405e-135
Lipid metabolic type	IP6K3	3.79284e-138	1.62748	0.023	0.005	5.4177e-134
Lipid metabolic type	NAT16	4.75593e-138	1.4291	0.024	0.005	6.79337e-134
Lipid metabolic type	DTX4	9.97223e-138	1.79877	0.03	0.008	1.42443e-133
Lipid metabolic type	LINC02525	1.28461e-137	1.23981	0.022	0.004	1.83494e-133
Lipid metabolic type	SYN3	4.85837e-137	1.12221	0.029	0.008	6.9397e-133
Lipid metabolic type	NDUFA4L2	1.78797e-136	1.54698	0.035	0.011	2.55394e-132
Lipid metabolic type	CT55	7.96178e-136	1.62107	0.025	0.006	1.13726e-131
Lipid metabolic type	AMER2	4.32172e-135	1.06359	0.03	0.008	6.17315e-131
Lipid metabolic type	AL031058.1	9.67652e-135	1.19333	0.028	0.007	1.38219e-130
Lipid metabolic type	IGLL1	2.14047e-134	1.14326	0.027	0.006	3.05745e-130
Lipid metabolic type	HAND2-AS1	2.59514e-134	1.52861	0.047	0.018	3.70689e-130
Lipid metabolic type	PCDHB15	3.1101e-134	1.11871	0.027	0.007	4.44246e-130
Lipid metabolic type	LINC01563	1.0456e-133	1.15021	0.023	0.005	1.49353e-129
Lipid metabolic type	FBLL1	9.4324e-133	1.15252	0.026	0.006	1.34732e-128
Lipid metabolic type	AC061992.2	9.59908e-133	1.39752	0.024	0.005	1.37113e-128
Lipid metabolic type	AC087521.2	3.40493e-132	1.21324	0.029	0.008	4.8636e-128
Lipid metabolic type	PTGES3L	4.85673e-132	1.19177	0.026	0.006	6.93736e-128
Lipid metabolic type	CTF1	1.0573e-131	1.02751	0.027	0.007	1.51025e-127
Lipid metabolic type	HS6ST2	3.48469e-131	1.44664	0.025	0.006	4.97753e-127
Lipid metabolic type	MAST1	4.12733e-131	1.53754	0.022	0.004	5.89548e-127
Lipid metabolic type	NKAIN3-IT1	1.44988e-130	1.31335	0.033	0.01	2.07101e-126
Lipid metabolic type	CLEC1A	4.81738e-130	1.16758	0.03	0.008	6.88115e-126
Lipid metabolic type	C1QTNF3	2.26692e-128	1.11754	0.072	0.035	3.23807e-124
Lipid metabolic type	AC244102.3	2.51076e-126	1.00293	0.028	0.007	3.58637e-122
Lipid metabolic type	ASCL1	2.7174e-126	1.93144	0.024	0.005	3.88154e-122
Lipid metabolic type	KCTD14	9.54126e-126	1.26184	0.029	0.008	1.36287e-121
Lipid metabolic type	AGT	4.90961e-125	1.59511	0.027	0.007	7.01288e-121
Lipid metabolic type	PCDHB5	2.49382e-124	1.10531	0.029	0.008	3.56217e-120
Lipid metabolic type	AC006329.1	4.76033e-124	1.02618	0.027	0.007	6.79965e-120
Lipid metabolic type	FAM81A	2.49142e-122	1.19363	0.029	0.008	3.55874e-118
Lipid metabolic type	EXOSC10-AS1	1.64172e-121	1.02496	0.028	0.008	2.34504e-117
Lipid metabolic type	AC010894.2	3.83786e-121	1.13754	0.022	0.005	5.482e-117
Lipid metabolic type	PSORS1C1	6.69021e-120	1.04574	0.026	0.007	9.5563e-116
Lipid metabolic type	CD36	8.49489e-120	1.47862	0.06	0.028	1.21341e-115
Lipid metabolic type	MACORIS	8.81267e-120	1.18071	0.025	0.006	1.2588e-115
Lipid metabolic type	SMCO3	2.09268e-119	1.00784	0.025	0.007	2.98919e-115
Lipid metabolic type	LCTL	6.76627e-119	1.3697	0.026	0.007	9.66494e-115
Lipid metabolic type	RHPN1-AS1	1.06551e-118	1.08599	0.023	0.005	1.52198e-114
Lipid metabolic type	NGFR	5.58299e-118	1.74778	0.037	0.013	7.97474e-114
Lipid metabolic type	ELFN1	1.72532e-115	1.03841	0.024	0.006	2.46445e-111
Lipid metabolic type	NPTXR	4.92702e-115	1.18783	0.032	0.01	7.03775e-111
Lipid metabolic type	FREM2	1.39743e-114	1.04019	0.036	0.012	1.99609e-110
Lipid metabolic type	CD2BP2-DT	4.96008e-114	1.08117	0.023	0.006	7.08498e-110
Lipid metabolic type	CDH7	1.17942e-113	1.25911	0.027	0.008	1.68469e-109
Lipid metabolic type	RBMS3-AS3	8.1156e-113	1.25687	0.021	0.005	1.15923e-108
Lipid metabolic type	STUM	1.01687e-112	1.15415	0.021	0.005	1.4525e-108
Lipid metabolic type	ANGPTL4	3.10638e-112	1.28415	0.041	0.016	4.43716e-108
Lipid metabolic type	LMO3	5.52561e-112	1.10375	0.028	0.008	7.89278e-108
Lipid metabolic type	SRCIN1	1.30106e-110	1.1425	0.024	0.006	1.85844e-106
Lipid metabolic type	MYRF	7.47287e-109	1.09728	0.026	0.007	1.06742e-104
Lipid metabolic type	HOXB9	9.85459e-109	1.01234	0.03	0.01	1.40763e-104
Lipid metabolic type	FAM181B	1.11744e-108	1.51598	0.024	0.006	1.59616e-104
Lipid metabolic type	KCNK15	1.32751e-108	1.28911	0.022	0.005	1.89622e-104
Lipid metabolic type	SORCS2	6.37134e-107	1.31884	0.03	0.01	9.10082e-103
Lipid metabolic type	ATP1A2	5.10027e-106	1.90693	0.024	0.006	7.28523e-102
Lipid metabolic type	HOXC11	1.10642e-105	1.09272	0.029	0.009	1.58041e-101
Lipid metabolic type	TRPM3	1.30356e-104	1.16467	0.031	0.01	1.86201e-100
Lipid metabolic type	NAGS	3.94037e-104	1.09372	0.021	0.005	5.62843e-100
Lipid metabolic type	LIF	2.49147e-103	1.62315	0.025	0.007	3.55882e-99
Lipid metabolic type	SLC30A10	2.84193e-100	1.32015	0.024	0.007	4.05941e-96
Lipid metabolic type	ABCC9	5.32862e-100	1.46461	0.022	0.006	7.6114e-96
Lipid metabolic type	CCNJL	4.98985e-99	1.13475	0.024	0.007	7.1275e-95
Lipid metabolic type	RORC	5.40457e-99	1.2742	0.022	0.006	7.71989e-95
Lipid metabolic type	KLHDC8A	5.93219e-97	1.78033	0.026	0.008	8.47353e-93
Lipid metabolic type	MEG3	1.321e-93	1.38675	0.061	0.032	1.88692e-89
Lipid metabolic type	ALDH1L1	1.93264e-93	1.14191	0.021	0.006	2.76059e-89
Lipid metabolic type	ERBB4	2.28717e-92	1.69522	0.021	0.006	3.267e-88
Lipid metabolic type	BEGAIN	6.81544e-91	1.0401	0.022	0.006	9.73518e-87
Lipid metabolic type	DDX25	2.13946e-88	1.2874	0.019	0.005	3.05601e-84
Lipid metabolic type	LRRC4C	9.68871e-87	1.44365	0.024	0.008	1.38393e-82
Lipid metabolic type	CYP27C1	1.28238e-86	1.14397	0.024	0.008	1.83175e-82
Lipid metabolic type	NKAIN1	5.30058e-82	1.12154	0.023	0.007	7.57135e-78
Lipid metabolic type	LONRF2	3.09182e-74	1.37092	0.023	0.008	4.41636e-70
Lipid metabolic type	IGSF9B	8.7378e-73	1.4946	0.019	0.006	1.24811e-68
Lipid metabolic type	CACNA2D1	6.50185e-72	1.05511	0.032	0.014	9.28724e-68
Lipid metabolic type	PTN	9.50018e-72	1.77021	0.058	0.033	1.35701e-67
Lipid metabolic type	C1QL1	2.38517e-68	1.14136	0.054	0.03	3.40698e-64
Lipid metabolic type	MEG8	1.03374e-67	1.38361	0.042	0.021	1.47659e-63
Lipid metabolic type	PGAM2	5.71226e-67	1.16267	0.019	0.006	8.15939e-63
Lipid metabolic type	SHD	7.48042e-63	1.6696	0.023	0.009	1.0685e-58
Lipid metabolic type	SOX11	3.87615e-61	1.25564	0.024	0.01	5.5367e-57
Lipid metabolic type	SSTR2	7.07124e-59	1.55463	0.021	0.008	1.01006e-54
Lipid metabolic type	ELAVL4	1.29965e-58	1.90717	0.019	0.007	1.85642e-54
Lipid metabolic type	GAL	2.87483e-51	1.98167	0.02	0.008	4.10641e-47
Lipid metabolic type	UCHL1	3.97053e-47	1.50599	0.023	0.011	5.6715e-43
Lipid metabolic type	TMEFF2	5.68638e-21	1.10782	0.023	0.014	8.12242e-17
MYC type	MTRNR2L8	0	1.94593	0.708	0.534	0
MYC type	MT-ATP8	0	1.72923	0.59	0.494	0
MYC type	ARGLU1	0	1.06527	0.711	0.788	0
MYC type	MT-ND1	0	1.19693	0.899	0.961	0
MYC type	MT-ND2	0	1.32379	0.909	0.962	0
MYC type	MT-ND4L	0	1.59492	0.737	0.689	0
MYC type	MT-ND3	0	1.37639	0.922	0.963	0
MYC type	MT-ND4	0	1.38116	0.955	0.987	0
MYC type	MT-ND5	0	1.4271	0.922	0.954	0
MYC type	MT-CO1	0	1.39579	0.968	0.995	0
MYC type	MT-ATP6	0	1.51785	0.967	0.994	0
MYC type	MT-CO3	0	1.49034	0.965	0.992	0
MYC type	MT-CYB	0	1.52493	0.963	0.99	0
MYC type	MT-CO2	0	1.52582	0.971	0.993	0
MYC type	MTRNR2L12	0	1.5899	0.778	0.793	0
MYC type	CHL1	7.8521e-180	1.06386	0.39	0.331	1.12159e-175
MYC type	MT-ND6	1.57223e-177	1.3168	0.464	0.473	2.24578e-173
MYC type	GCNT2	8.3851e-162	1.39585	0.377	0.345	1.19773e-157
MYC type	XIST	8.33683e-161	1.25873	0.414	0.392	1.19083e-156
MYC type	FTX	1.937e-97	1.14125	0.379	0.378	2.76681e-93
MYC type	PCDH7	6.58528e-90	1.20953	0.334	0.316	9.40642e-86
MYC type	LHFPL3-AS1	5.29874e-71	1.13844	0.284	0.25	7.56872e-67
MYC type	HPS4	5.53898e-71	1.23645	0.357	0.367	7.91188e-67
MYC type	BX890604.2	2.72957e-69	1.3039	0.266	0.243	3.89892e-65
MYC type	TRPM1	3.85599e-28	1.00254	0.161	0.139	5.50789e-24
MYC type	AC096564.1	2.00604e-26	1.01383	0.053	0.079	2.86543e-22
MYC type	TSIX	1.0928e-25	1.76958	0.063	0.046	1.56096e-21
MYC type	AL354740.1	2.10935e-21	1.00618	0.091	0.124	3.013e-17
MYC type	SCGB1A1	7.37228e-21	1.31818	0.018	0.01	1.05306e-16
MYC type	CCDC144A	6.37687e-20	1.1524	0.248	0.255	9.10871e-16
MYC type	PABPC5	1.00378e-19	1.02736	0.032	0.048	1.4338e-15
MYC type	HMGA2-AS1	6.22748e-19	1.57689	0.1	0.086	8.89533e-15
MYC type	WDR19	6.40329e-18	1.04138	0.054	0.075	9.14646e-14
MYC type	RNPC3	8.35204e-18	1.25052	0.203	0.2	1.193e-13
MYC type	HMCN1	9.88898e-18	1.16233	0.278	0.301	1.41254e-13
MYC type	CELSR2	8.42145e-17	1.03368	0.099	0.131	1.20292e-12
MYC type	ADGRA3	8.80268e-17	1.02256	0.073	0.098	1.25738e-12
MYC type	KIF25	3.38959e-16	1.00068	0.01	0.019	4.84169e-12
MYC type	CABLES1	3.2787e-15	1.10548	0.278	0.3	4.6833e-11
MYC type	UGGT2	6.37146e-15	1.00266	0.15	0.195	9.10099e-11
MYC type	IQCK	1.34057e-14	1.0903	0.081	0.106	1.91488e-10
MYC type	PLAC4	1.89224e-14	2.03428	0.037	0.027	2.70287e-10
MYC type	MTRNR2L10	2.0061e-14	1.56241	0.032	0.022	2.86552e-10
MYC type	CCDC36	1.03621e-12	1.05506	0.029	0.04	1.48012e-08
MYC type	LINC01896	2.65271e-12	1.01447	0.036	0.049	3.78914e-08
MYC type	SULT1C2	2.78244e-12	1.1164	0.022	0.033	3.97443e-08
MYC type	AC108734.4	7.15991e-12	1.69009	0.03	0.022	1.02272e-07
MYC type	BX842570.1	1.65251e-11	1.63581	0.033	0.025	2.36045e-07
MYC type	ATP1A1-AS1	2.20071e-11	1.57932	0.085	0.075	3.14349e-07
MYC type	LINC01320	2.22595e-11	1.2118	0.028	0.039	3.17954e-07
MYC type	TMPRSS5	2.59966e-11	1.00038	0.018	0.027	3.71336e-07
MYC type	AC008771.1	5.46269e-11	1.01623	0.148	0.185	7.80291e-07
MYC type	HIST1H2BH	7.21073e-11	1.08904	0.047	0.061	1.02998e-06
MYC type	FSBP	8.64314e-11	1.10172	0.031	0.042	1.23459e-06
MYC type	LINC00461	2.71849e-10	1.24515	0.06	0.077	3.88309e-06
MYC type	PCDH10	6.57893e-10	1.41012	0.012	0.019	9.39734e-06
MYC type	PABPC1L	7.86085e-10	1.04549	0.061	0.077	1.12284e-05
MYC type	FSD1L	1.04374e-09	1.05438	0.057	0.073	1.49087e-05
MYC type	AC016597.1	1.07548e-09	1.00568	0.015	0.023	1.53621e-05
MYC type	AC007106.2	1.49745e-09	1.45316	0.067	0.058	2.13895e-05
MYC type	AC010624.5	2.41519e-09	2.28333	0.026	0.019	3.44986e-05
MYC type	NHLRC3	2.68163e-09	1.05685	0.281	0.316	3.83044e-05
MYC type	ANKRD30B	3.21592e-09	1.04625	0.007	0.012	4.59362e-05
MYC type	NHSL1	3.52506e-09	1.24642	0.113	0.142	5.0352e-05
MYC type	NAALADL2	4.40368e-09	1.21448	0.031	0.042	6.29022e-05
MYC type	PRDM5	4.47067e-09	1.01555	0.036	0.047	6.3859e-05
MYC type	AP000487.1	8.28167e-09	1.33982	0.015	0.022	0.000118295
MYC type	AC011246.1	1.19116e-08	1.03418	0.016	0.024	0.000170145
MYC type	AL162595.1	1.25002e-08	1.17712	0.034	0.045	0.000178553
MYC type	AC100793.2	1.60427e-08	1.04668	0.026	0.035	0.000229154
MYC type	AL357079.1	2.03381e-08	1.01997	0.01	0.015	0.000290509
MYC type	COL27A1	2.95803e-08	1.17126	0.03	0.04	0.000422525
MYC type	TTPA	3.395e-08	1.00658	0.026	0.035	0.000484942
MYC type	LINC00310	3.56925e-08	1.09817	0.009	0.014	0.000509831
MYC type	AC004951.1	3.923e-08	1.04277	0.059	0.074	0.000560362
MYC type	AC064829.1	4.32676e-08	1.03341	0.008	0.013	0.000618035
MYC type	HORMAD1	4.74935e-08	1.36743	0.014	0.021	0.000678397
MYC type	AC093821.1	6.37508e-08	1.64527	0.042	0.035	0.000910617
MYC type	ZNF300	9.18828e-08	1.00053	0.055	0.069	0.00131245
MYC type	AL355596.1	9.59329e-08	1.20996	0.026	0.034	0.00137031
MYC type	AL117335.1	1.10318e-07	1.05148	0.023	0.03	0.00157578
MYC type	AC006946.2	1.3083e-07	1.07742	0.015	0.021	0.00186877
MYC type	AL008729.2	1.34406e-07	1.09747	0.027	0.036	0.00191986
MYC type	PTPRG-AS1	1.37716e-07	1.08467	0.026	0.034	0.00196713
MYC type	AL591846.2	1.47904e-07	1.04023	0.01	0.015	0.00211267
MYC type	DZIP1L	1.74379e-07	1.10021	0.042	0.053	0.00249084
MYC type	Z97205.2	3.41648e-07	1.12944	0.016	0.022	0.00488011
MYC type	MSH5	3.71758e-07	1.06586	0.023	0.031	0.00531019
MYC type	LPIN3	4.16722e-07	1.23749	0.036	0.045	0.00595246
MYC type	PDE10A	4.44449e-07	1.10863	0.134	0.164	0.00634851
MYC type	AC097532.2	5.97789e-07	1.11674	0.014	0.019	0.00853882
MYC type	LINC02249	7.60313e-07	1.0642	0.008	0.013	0.0108603
MYC type	BX664727.3	1.0193e-06	1.0501	0.009	0.014	0.0145596
MYC type	ONECUT1	1.06509e-06	1.25009	0.043	0.053	0.0152137
MYC type	DANT2	1.10936e-06	1.3025	0.01	0.015	0.0158461
MYC type	DMD	1.50698e-06	1.08993	0.092	0.111	0.0215258
MYC type	AL353194.1	2.41442e-06	1.02267	0.03	0.038	0.0344876
MYC type	LINC02434	2.50469e-06	1.16165	0.019	0.025	0.0357769
MYC type	LINC01673	2.52516e-06	1.79714	0.017	0.013	0.0360693
MYC type	AC107419.1	2.88219e-06	1.51012	0.02	0.026	0.0411693
BER type	TYMS	0	2.3962	0.821	0.167	0
BER type	MCM4	0	2.1006	0.847	0.231	0
BER type	PCLAF	0	2.40323	0.698	0.103	0
BER type	CENPU	0	1.88635	0.703	0.145	0
BER type	PHGDH	0	1.65863	0.836	0.284	0
BER type	MCM7	0	1.9499	0.724	0.172	0
BER type	ATAD2	0	1.68378	0.734	0.184	0
BER type	TMEM106C	0	1.99062	0.757	0.224	0
BER type	GGH	0	1.96207	0.7	0.174	0
BER type	CLSPN	0	2.39811	0.605	0.081	0
BER type	GMNN	0	1.67007	0.735	0.219	0
BER type	SMC2	0	1.39643	0.764	0.249	0
BER type	MCM5	0	1.75914	0.678	0.168	0
BER type	USP1	0	1.54764	0.808	0.305	0
BER type	DNMT1	0	1.32606	0.806	0.303	0
BER type	GINS2	0	2.37745	0.596	0.094	0
BER type	MCM3	0	1.8952	0.718	0.221	0
BER type	PCNA	0	1.70353	0.733	0.239	0
BER type	HELLS	0	1.43647	0.674	0.183	0
BER type	RFC4	0	1.80846	0.634	0.146	0
BER type	PAICS	0	1.41394	0.786	0.305	0
BER type	SMC1A	0	1.34417	0.866	0.387	0
BER type	GPM6B	0	1.19489	0.886	0.409	0
BER type	TFDP1	0	1.48779	0.71	0.233	0
BER type	GMPS	0	1.57751	0.726	0.252	0
BER type	UBE2T	0	1.70025	0.606	0.134	0
BER type	SEPTIN11	0	1.25597	0.757	0.286	0
BER type	CENPM	0	1.72199	0.588	0.117	0
BER type	GGCT	0	1.41496	0.787	0.318	0
BER type	CTNNAL1	0	1.28461	0.727	0.258	0
BER type	MSH6	0	1.47556	0.71	0.243	0
BER type	PDS5B	0	1.25928	0.765	0.302	0
BER type	SLBP	0	1.42448	0.738	0.277	0
BER type	WDR34	0	1.85721	0.608	0.15	0
BER type	RBBP7	0	1.22486	0.867	0.411	0
BER type	CRNDE	0	1.01054	0.782	0.327	0
BER type	CBX5	0	1.10956	0.833	0.385	0
BER type	BANCR	0	1.08282	0.824	0.378	0
BER type	DTL	0	2.88408	0.491	0.046	0
BER type	HACD3	0	1.24173	0.825	0.381	0
BER type	HADH	0	1.5971	0.649	0.208	0
BER type	PRDX4	0	1.10904	0.898	0.46	0
BER type	RFC2	0	1.73794	0.594	0.156	0
BER type	RANBP1	0	1.42956	0.946	0.509	0
BER type	DUT	0	1.61218	0.932	0.496	0
BER type	GLO1	0	1.06301	0.854	0.421	0
BER type	LSM4	0	1.1228	0.818	0.386	0
BER type	EMP2	0	1.24318	0.65	0.219	0
BER type	PSIP1	0	1.36259	0.915	0.486	0
BER type	IPO5	0	1.24851	0.693	0.265	0
BER type	MAD2L1	0	1.11531	0.594	0.168	0
BER type	ZNF704	0	1.01564	0.762	0.337	0
BER type	ACTL6A	0	1.18355	0.675	0.252	0
BER type	CDCA7L	0	1.45375	0.6	0.18	0
BER type	PDLIM3	0	1.25483	0.672	0.253	0
BER type	POSTN	0	1.17544	0.671	0.253	0
BER type	BACE2	0	1.06475	0.771	0.353	0
BER type	E2F1	0	2.59812	0.466	0.049	0
BER type	PXMP2	0	1.6871	0.564	0.149	0
BER type	PARP1	0	1.24184	0.922	0.508	0
BER type	PAFAH1B3	0	1.10411	0.694	0.282	0
BER type	MCM6	0	1.97849	0.508	0.097	0
BER type	PRKDC	0	1.32899	0.942	0.531	0
BER type	COMMD4	0	1.09398	0.742	0.332	0
BER type	CARHSP1	0	1.17323	0.651	0.242	0
BER type	LSM2	0	1.02312	0.852	0.444	0
BER type	VKORC1	0	1.04496	0.819	0.411	0
BER type	GART	0	1.05363	0.668	0.261	0
BER type	PHF19	0	1.45626	0.549	0.144	0
BER type	HLTF	0	1.08286	0.673	0.269	0
BER type	PSMG1	0	1.26526	0.655	0.251	0
BER type	POLD2	0	1.10418	0.703	0.299	0
BER type	HSPB11	0	1.17231	0.709	0.307	0
BER type	HMGB3	0	1.36905	0.571	0.17	0
BER type	LIG1	0	1.56015	0.549	0.149	0
BER type	CDK4	0	1.10671	0.724	0.325	0
BER type	LAGE3	0	1.03038	0.762	0.364	0
BER type	PCDH7	0	1.03149	0.697	0.299	0
BER type	CHML	0	1.17558	0.621	0.225	0
BER type	C21orf58	0	1.62103	0.502	0.106	0
BER type	SMS	0	1.01907	0.766	0.37	0
BER type	GNG4	0	2.05699	0.488	0.093	0
BER type	SPRY2	0	1.02813	0.795	0.4	0
BER type	TOPBP1	0	1.10278	0.598	0.204	0
BER type	ATAD5	0	1.37423	0.522	0.128	0
BER type	DPM2	0	1.01108	0.658	0.265	0
BER type	AIF1L	0	1.06529	0.648	0.255	0
BER type	A2M	0	1.05974	0.785	0.393	0
BER type	SPTSSA	0	1.05848	0.664	0.272	0
BER type	TEX30	0	1.577	0.538	0.147	0
BER type	MCUR1	0	1.1758	0.658	0.269	0
BER type	DCTPP1	0	1.24956	0.607	0.218	0
BER type	CDKN2A	0	1.31792	0.755	0.367	0
BER type	RRM1	0	1.66358	0.515	0.127	0
BER type	GCSH	0	1.02946	0.713	0.325	0
BER type	NASP	0	1.12109	0.945	0.558	0
BER type	BRCA2	0	1.4051	0.505	0.119	0
BER type	AP2S1	0	1.13754	0.894	0.508	0
BER type	MAGEF1	0	1.00016	0.67	0.285	0
BER type	FNIP2	0	1.05641	0.635	0.25	0
BER type	FEN1	0	1.83459	0.5	0.115	0
BER type	TMEM97	0	1.82069	0.518	0.133	0
BER type	TSEN34	0	1.13347	0.638	0.253	0
BER type	GNB4	0	1.11816	0.6	0.216	0
BER type	LMNB1	0	1.36786	0.5	0.118	0
BER type	NFIB	0	1.15488	0.569	0.187	0
BER type	WDR76	0	1.97539	0.453	0.072	0
BER type	CHAF1A	0	1.87769	0.472	0.091	0
BER type	POLA1	0	1.84513	0.478	0.099	0
BER type	PTGR1	0	1.2228	0.603	0.227	0
BER type	RFC3	0	1.56015	0.481	0.106	0
BER type	CYB5A	0	1.06494	0.611	0.236	0
BER type	TBC1D4	0	1.07537	0.681	0.307	0
BER type	MSH2	0	1.39492	0.533	0.159	0
BER type	CDC6	0	2.61688	0.418	0.045	0
BER type	DHFR	0	1.70532	0.518	0.147	0
BER type	E2F3	0	1.21219	0.553	0.184	0
BER type	EZH2	0	1.1686	0.527	0.158	0
BER type	NT5DC2	0	1.71501	0.492	0.124	0
BER type	TUBB	0	1.34033	0.975	0.607	0
BER type	TCF19	0	2.27029	0.428	0.06	0
BER type	PRSS23	0	1.09021	0.6	0.232	0
BER type	NUDT15	0	1.21283	0.533	0.165	0
BER type	CENPK	0	1.39759	0.497	0.131	0
BER type	CCNE2	0	2.57347	0.408	0.043	0
BER type	C3orf14	0	1.3803	0.547	0.183	0
BER type	PRC1	0	1.05047	0.47	0.106	0
BER type	CNTLN	0	1.15186	0.552	0.189	0
BER type	TUSC3	0	1.27806	0.55	0.188	0
BER type	CENPJ	0	1.16452	0.509	0.147	0
BER type	RBBP8	0	1.79287	0.472	0.11	0
BER type	IPO9	0	1.17777	0.554	0.193	0
BER type	POP7	0	1.22292	0.56	0.199	0
BER type	C19orf48	0	1.36106	0.524	0.163	0
BER type	AHCY	0	1.09155	0.611	0.251	0
BER type	DONSON	0	2.05536	0.434	0.074	0
BER type	DTYMK	0	1.05246	0.577	0.218	0
BER type	UNG	0	1.82921	0.46	0.101	0
BER type	CRIP2	0	1.03869	0.595	0.237	0
BER type	TPGS2	0	1.01711	0.594	0.236	0
BER type	CEP78	0	1.28379	0.502	0.146	0
BER type	ZC3H13	0	1.08994	0.962	0.606	0
BER type	NME4	0	1.02759	0.646	0.291	0
BER type	FANCI	0	1.82074	0.436	0.081	0
BER type	PRPS2	0	1.32175	0.515	0.16	0
BER type	FXYD1	0	1.00289	0.564	0.21	0
BER type	EIF4EBP1	0	1.04185	0.636	0.283	0
BER type	TMEM158	0	1.3457	0.503	0.151	0
BER type	CDCA7	0	1.82438	0.427	0.076	0
BER type	AKR1B1	0	1.05596	0.573	0.223	0
BER type	ORC6	0	1.86342	0.438	0.088	0
BER type	CASP8AP2	0	1.05131	0.535	0.187	0
BER type	RPA2	0	1.0425	0.571	0.223	0
BER type	MCM2	0	2.13929	0.411	0.063	0
BER type	EBP	0	1.05925	0.559	0.213	0
BER type	SHISA2	0	1.17012	0.537	0.191	0
BER type	ENOPH1	0	1.15996	0.534	0.189	0
BER type	KANK2	0	1.18926	0.542	0.197	0
BER type	NCAPG2	0	1.39858	0.449	0.105	0
BER type	POLD3	0	1.23401	0.486	0.142	0
BER type	CDT1	0	2.3204	0.392	0.049	0
BER type	UHRF1	0	2.59431	0.381	0.038	0
BER type	FH	0	1.15432	0.541	0.2	0
BER type	CTDSPL	0	1.15517	0.541	0.2	0
BER type	ALYREF	0	1.07652	0.522	0.181	0
BER type	SACS	0	1.14606	0.503	0.163	0
BER type	AP1S2	0	1.02945	0.986	0.646	0
BER type	STMN1	0	1.23937	0.994	0.655	0
BER type	ZWINT	0	1.90349	0.409	0.07	0
BER type	LHFPL6	0	1.16018	0.5	0.161	0
BER type	ASF1B	0	2.26833	0.389	0.052	0
BER type	SAE1	0	1.09797	0.507	0.172	0
BER type	TUSC1	0	1.36602	0.478	0.143	0
BER type	RBL1	0	1.41521	0.445	0.111	0
BER type	HMGN5	0	1.34602	0.465	0.131	0
BER type	SNRNP25	0	1.12558	0.533	0.2	0
BER type	PSAT1	0	1.09552	0.511	0.181	0
BER type	PAQR4	0	2.06652	0.403	0.073	0
BER type	SNX7	0	1.33349	0.481	0.152	0
BER type	GOLM1	0	1.01766	0.519	0.191	0
BER type	POLR3K	0	1.13716	0.519	0.191	0
BER type	TMEM47	0	1.39467	0.453	0.125	0
BER type	DERA	0	1.11142	0.53	0.207	0
BER type	PPAT	0	1.27517	0.463	0.14	0
BER type	SH3RF1	0	1.04304	0.507	0.185	0
BER type	FAM111B	0	2.48121	0.357	0.036	0
BER type	SLC7A1	0	1.26102	0.477	0.156	0
BER type	BARD1	0	1.30084	0.427	0.107	0
BER type	NSD2	0	1.19081	0.442	0.123	0
BER type	CTPS1	0	1.34975	0.425	0.107	0
BER type	HDGFL3	0	1.01748	0.503	0.185	0
BER type	DBNDD2	0	1.13778	0.487	0.169	0
BER type	BRCA1	0	1.552	0.42	0.103	0
BER type	CADPS2	0	1.09244	0.465	0.151	0
BER type	ZNF667-AS1	0	1.04829	0.48	0.166	0
BER type	RCAN1	0	1.02232	0.539	0.228	0
BER type	RMI1	0	1.71852	0.394	0.083	0
BER type	PLOD2	0	1.2244	0.447	0.14	0
BER type	CHAF1B	0	1.88412	0.376	0.069	0
BER type	CHAMP1	0	1.07895	0.465	0.159	0
BER type	CLN6	0	1.14192	0.456	0.15	0
BER type	DSN1	0	1.67286	0.392	0.086	0
BER type	SLC25A5	0	1.03012	0.961	0.656	0
BER type	KLHL42	0	1.32661	0.438	0.134	0
BER type	PHLDA2	0	1.35031	0.457	0.154	0
BER type	HSDL2	0	1.07906	0.465	0.165	0
BER type	DEK	0	1.38555	0.989	0.69	0
BER type	EMCN	0	1.02275	0.466	0.168	0
BER type	ACOT7	0	1.27399	0.448	0.151	0
BER type	SHMT1	0	1.04058	0.459	0.162	0
BER type	WLS	0	1.0728	0.475	0.18	0
BER type	MMS22L	0	1.49785	0.375	0.082	0
BER type	DCK	0	1.02307	0.435	0.143	0
BER type	CSE1L	0	1.08336	0.443	0.151	0
BER type	CBR3	0	1.09046	0.449	0.157	0
BER type	CCHCR1	0	1.31044	0.412	0.12	0
BER type	KIF22	0	1.0013	0.439	0.152	0
BER type	HMGN2	0	1.13182	0.975	0.689	0
BER type	MDC1	0	1.11084	0.414	0.129	0
BER type	HPGD	0	1.2127	0.426	0.142	0
BER type	FAM20B	0	1.1654	0.428	0.145	0
BER type	ZMYND19	0	1.50318	0.38	0.098	0
BER type	MAP3K20	0	1.54402	0.37	0.09	0
BER type	CENPH	0	1.74022	0.346	0.067	0
BER type	TUBA1B	0	1.17677	0.983	0.705	0
BER type	GJC1	0	1.25145	0.394	0.116	0
BER type	TMEM38B	0	1.52682	0.373	0.096	0
BER type	UCK1	0	1.14857	0.409	0.132	0
BER type	ICMT	0	1.43415	0.381	0.105	0
BER type	JPT2	0	1.25748	0.394	0.118	0
BER type	ZNF367	0	2.33364	0.314	0.039	0
BER type	SCRG1	0	1.06575	0.413	0.138	0
BER type	PRIM1	0	1.13238	0.375	0.101	0
BER type	C9orf40	0	1.65467	0.356	0.082	0
BER type	FANCL	0	1.20921	0.406	0.133	0
BER type	CHEK1	0	1.76329	0.332	0.06	0
BER type	FIGNL1	0	1.30069	0.358	0.088	0
BER type	RPL39L	0	1.25458	0.398	0.129	0
BER type	SLC16A1-AS1	0	1.03721	0.408	0.139	0
BER type	MYLK	0	1.26141	0.4	0.132	0
BER type	PIGX	0	1.1773	0.402	0.136	0
BER type	NCAPD3	0	1.03122	0.373	0.108	0
BER type	ARHGAP10	0	1.10506	0.384	0.12	0
BER type	TJP2	0	1.34622	0.358	0.096	0
BER type	FANCA	0	1.78947	0.315	0.053	0
BER type	LHX2	0	2.15867	0.31	0.049	0
BER type	ANXA5	0	1.01022	0.991	0.731	0
BER type	MNS1	0	1.52685	0.341	0.081	0
BER type	SMIM10	0	1.19344	0.391	0.131	0
BER type	MCOLN3	0	1.31365	0.37	0.111	0
BER type	SIGMAR1	0	1.00177	0.414	0.155	0
BER type	NR2C2AP	0	1.28443	0.364	0.108	0
BER type	POU3F3	0	1.07299	0.374	0.119	0
BER type	GPX3	0	1.12742	0.389	0.135	0
BER type	SLFN13	0	1.64642	0.316	0.062	0
BER type	TK1	0	1.87994	0.305	0.051	0
BER type	PAWR	0	1.09574	0.373	0.12	0
BER type	RMI2	0	1.91544	0.303	0.051	0
BER type	LRRCC1	0	1.27611	0.363	0.112	0
BER type	CCDC34	0	1.16127	0.377	0.126	0
BER type	NABP2	0	1.14755	0.389	0.138	0
BER type	RAD51AP1	0	1.62144	0.304	0.055	0
BER type	TIPIN	0	1.26582	0.349	0.1	0
BER type	CCNE1	0	2.47911	0.28	0.033	0
BER type	NCAPH2	0	1.26597	0.337	0.09	0
BER type	RAD18	0	1.10592	0.355	0.108	0
BER type	ANKRD9	0	1.33825	0.35	0.103	0
BER type	UBR7	0	1.23565	0.342	0.096	0
BER type	KATNAL1	0	1.17658	0.343	0.101	0
BER type	SAC3D1	0	1.41775	0.344	0.102	0
BER type	NUP155	0	1.23738	0.337	0.096	0
BER type	RRM2	0	1.50788	0.286	0.046	0
BER type	FRGCA	0	1.37227	0.311	0.073	0
BER type	PDXP	0	1.35216	0.336	0.099	0
BER type	CDKN2B-AS1	0	1.40053	0.318	0.081	0
BER type	IMPA2	0	1.62162	0.31	0.074	0
BER type	ARSE	0	1.37289	0.323	0.088	0
BER type	SEPHS1	0	1.04277	0.352	0.117	0
BER type	CDC45	0	2.47843	0.261	0.027	0
BER type	CDK1	0	1.20396	0.291	0.057	0
BER type	SSX2IP	0	1.19281	0.341	0.108	0
BER type	ATAD3A	0	1.33694	0.322	0.089	0
BER type	FN3KRP	0	1.02818	0.359	0.126	0
BER type	C16orf95	0	1.07787	0.33	0.1	0
BER type	APOO	0	1.09482	0.363	0.133	0
BER type	MIS18A	0	1.21713	0.331	0.102	0
BER type	CDCA4	0	1.30657	0.321	0.092	0
BER type	BRI3BP	0	1.40193	0.307	0.078	0
BER type	UBL4A	0	1.05966	0.356	0.127	0
BER type	E2F7	0	1.79741	0.275	0.047	0
BER type	SGCB	0	1.0163	0.355	0.129	0
BER type	LPL	0	1.57661	0.299	0.074	0
BER type	TUBG1	0	1.25171	0.329	0.106	0
BER type	RFXAP	0	1.10498	0.31	0.087	0
BER type	H2AFZ	0	1.21731	0.997	0.774	0
BER type	MELK	0	1.68415	0.268	0.046	0
BER type	TRMT9B	0	1.14168	0.315	0.093	0
BER type	DHTKD1	0	1.05484	0.327	0.108	0
BER type	LRP2	0	1.1008	0.321	0.104	0
BER type	ZNF385B	0	1.4829	0.283	0.067	0
BER type	DUSP14	0	1.01035	0.351	0.135	0
BER type	DHCR24	0	1.6722	0.283	0.068	0
BER type	ECT2	0	1.02556	0.294	0.079	0
BER type	KNTC1	0	1.28346	0.274	0.061	0
BER type	FANCB	0	1.35615	0.274	0.061	0
BER type	EEF1AKMT1	0	1.07372	0.318	0.106	0
BER type	SLC29A1	0	1.11386	0.311	0.101	0
BER type	OLFM1	0	1.67104	0.274	0.066	0
BER type	BLM	0	1.38871	0.263	0.057	0
BER type	UCK2	0	1.2577	0.292	0.086	0
BER type	ARHGEF26	0	1.04385	0.292	0.086	0
BER type	NRM	0	1.45742	0.27	0.065	0
BER type	CKB	0	1.1959	0.309	0.104	0
BER type	RFWD3	0	1.11138	0.283	0.078	0
BER type	BRIP1	0	1.94561	0.236	0.034	0
BER type	FBXO5	0	1.08539	0.275	0.075	0
BER type	MMP16	0	1.01637	0.303	0.103	0
BER type	FBXO45	0	1.10731	0.293	0.093	0
BER type	ELOVL6	0	1.5148	0.262	0.064	0
BER type	ZGRF1	0	1.24417	0.256	0.058	0
BER type	MCM10	0	2.4612	0.221	0.023	0
BER type	PHLDB2	0	1.09435	0.276	0.08	0
BER type	TYMSOS	0	1.32352	0.265	0.069	0
BER type	CDC7	0	1.32307	0.261	0.066	0
BER type	PLCXD1	0	1.33693	0.256	0.061	0
BER type	XRCC2	0	1.78001	0.237	0.042	0
BER type	CDC42EP1	0	1.10365	0.29	0.097	0
BER type	NETO2	0	1.77471	0.241	0.05	0
BER type	POLE	0	1.56364	0.234	0.045	0
BER type	ASB9	0	1.27025	0.271	0.082	0
BER type	KLHL23	0	1.90603	0.222	0.035	0
BER type	POGLUT3	0	1.55749	0.24	0.055	0
BER type	SPATA33	0	1.08246	0.266	0.082	0
BER type	FOXM1	0	1.36595	0.232	0.049	0
BER type	TIMELESS	0	1.89604	0.22	0.037	0
BER type	HOXA10	0	1.11148	0.26	0.079	0
BER type	SKA3	0	1.54046	0.222	0.041	0
BER type	EXO1	0	2.32831	0.203	0.023	0
BER type	RAC3	0	1.12883	0.274	0.094	0
BER type	RPP25	0	1.26251	0.27	0.091	0
BER type	USP13	0	1.09749	0.259	0.08	0
BER type	DOK5	0	1.52345	0.242	0.063	0
BER type	MND1	0	1.79008	0.214	0.036	0
BER type	B3GLCT	0	1.2629	0.249	0.071	0
BER type	LMNB2	0	1.10424	0.259	0.081	0
BER type	CENPQ	0	1.08956	0.259	0.082	0
BER type	TMTC4	0	1.24288	0.24	0.063	0
BER type	HUNK	0	1.87462	0.213	0.036	0
BER type	WASF3	0	1.38212	0.235	0.059	0
BER type	ZNF718	0	1.29116	0.233	0.058	0
BER type	INTS7	0	1.20206	0.24	0.066	0
BER type	GPD2	0	1.01418	0.259	0.085	0
BER type	TMSB15A	0	1.39635	0.22	0.047	0
BER type	CENPS	0	1.34338	0.237	0.065	0
BER type	MYBL2	0	1.89843	0.2	0.029	0
BER type	RUSC1	0	1.07334	0.255	0.085	0
BER type	CNTN4	0	1.10092	0.247	0.077	0
BER type	ASRGL1	0	1.43354	0.238	0.068	0
BER type	DSG2	0	1.46614	0.223	0.054	0
BER type	WDR5	0	1.00682	0.249	0.081	0
BER type	SPIN4	0	1.84212	0.201	0.034	0
BER type	LRRC42	0	1.23975	0.244	0.077	0
BER type	BCL7A	0	1.04791	0.25	0.083	0
BER type	MAOB	0	1.13279	0.241	0.074	0
BER type	APEX2	0	1.18463	0.236	0.069	0
BER type	THORLNC	0	1.65892	0.205	0.039	0
BER type	MESP1	0	1.87234	0.211	0.045	0
BER type	INAFM1	0	1.03374	0.236	0.07	0
BER type	FOXRED2	0	1.0927	0.246	0.08	0
BER type	DZIP1	0	1.19138	0.226	0.061	0
BER type	ITGA9-AS1	0	1.07344	0.245	0.08	0
BER type	SLC25A40	0	1.01876	0.234	0.07	0
BER type	C16orf74	0	1.20472	0.229	0.065	0
BER type	SERTAD4-AS1	0	1.57096	0.207	0.043	0
BER type	DYNC1I1	0	1.02142	0.234	0.071	0
BER type	RFC5	0	1.35638	0.215	0.052	0
BER type	LINC01896	0	1.63299	0.199	0.037	0
BER type	FBLN1	0	1.14607	0.215	0.053	0
BER type	TTLL7	0	1.56358	0.21	0.048	0
BER type	FANCG	0	1.59321	0.205	0.043	0
BER type	NRGN	0	1.45748	0.208	0.046	0
BER type	PRKAG2-AS1	0	1.11551	0.231	0.072	0
BER type	ELOVL2	0	1.26491	0.226	0.067	0
BER type	MYBL1	0	1.16333	0.202	0.044	0
BER type	NCAPG	0	1.15825	0.201	0.045	0
BER type	CAP2	0	1.28467	0.225	0.07	0
BER type	PIEZO2	0	1.27246	0.208	0.053	0
BER type	MCM8	0	1.23808	0.211	0.056	0
BER type	CERS1	0	1.2739	0.214	0.064	0
BER type	WDHD1	0	1.53241	0.189	0.04	0
BER type	NCS1	0	1.61613	0.198	0.05	0
BER type	SLC39A8	0	1.00391	0.201	0.054	0
BER type	ZNF347	0	1.23025	0.201	0.054	0
BER type	PRDM5	0	1.6962	0.184	0.037	0
BER type	SMAD1	0	1.14395	0.206	0.06	0
BER type	ZNF483	0	1.11515	0.201	0.056	0
BER type	ZWILCH	0	1.09065	0.196	0.054	0
BER type	TCEA3	0	1.39706	0.195	0.054	0
BER type	RCC1	0	1.18364	0.196	0.056	0
BER type	SUV39H2	0	1.28055	0.185	0.045	0
BER type	ESCO2	0	1.54386	0.175	0.035	0
BER type	SERTAD4	0	1.5997	0.169	0.03	0
BER type	RIMS2	0	1.41192	0.187	0.048	0
BER type	PSMC3IP	0	1.39914	0.183	0.045	0
BER type	SH2D4A	0	1.2537	0.187	0.05	0
BER type	SALL3	0	1.21532	0.179	0.043	0
BER type	RAD51	0	1.77699	0.16	0.025	0
BER type	KIAA1841	0	1.24676	0.178	0.044	0
BER type	IL33	0	1.32759	0.177	0.043	0
BER type	TEX15	0	1.87567	0.159	0.026	0
BER type	GINS1	0	2.04624	0.158	0.026	0
BER type	GINS4	0	1.26423	0.171	0.04	0
BER type	CCNF	0	1.22764	0.176	0.045	0
BER type	POLD1	0	1.33577	0.172	0.041	0
BER type	AC138649.1	0	1.52611	0.165	0.035	0
BER type	LIN9	0	1.15525	0.174	0.045	0
BER type	PKMYT1	0	1.90276	0.151	0.022	0
BER type	RIPPLY3	0	2.28398	0.145	0.016	0
BER type	PTPN3	0	1.4281	0.166	0.04	0
BER type	SPC25	0	1.25157	0.156	0.031	0
BER type	CENPP	0	1.29447	0.16	0.038	0
BER type	C19orf57	0	1.85343	0.147	0.026	0
BER type	CNIH2	0	2.45429	0.133	0.014	0
BER type	DSCC1	0	1.79295	0.146	0.027	0
BER type	SYCE1L	0	1.36232	0.155	0.036	0
BER type	C1orf112	0	1.26307	0.155	0.037	0
BER type	C3orf70	0	1.37707	0.155	0.038	0
BER type	MT1M	0	1.17299	0.153	0.036	0
BER type	CENPI	0	1.69599	0.14	0.025	0
BER type	PBK	0	1.40856	0.149	0.034	0
BER type	ATP2A1-AS1	0	1.70321	0.143	0.028	0
BER type	SYCP2	0	1.3549	0.147	0.033	0
BER type	DERL3	0	1.33336	0.134	0.024	0
BER type	TTPA	0	1.54037	0.136	0.027	0
BER type	CCDC3	0	1.48723	0.14	0.031	0
BER type	GINS3	0	1.48392	0.138	0.029	0
BER type	CDC25A	0	2.16609	0.123	0.016	0
BER type	CDCA5	0	1.35932	0.132	0.028	0
BER type	AC022150.4	0	1.55657	0.125	0.023	0
BER type	HMGB1	0	1.03141	1	0.899	0
BER type	RECQL4	0	1.77726	0.118	0.019	0
BER type	KITLG	0	1.98368	0.111	0.016	0
BER type	CABLES2	0	1.6911	0.117	0.022	0
BER type	DCX	0	1.75173	0.111	0.017	0
BER type	E2F2	0	2.15232	0.106	0.013	0
BER type	TEDC2	0	2.00249	0.11	0.017	0
BER type	SEPTIN4-AS1	0	1.61337	0.115	0.022	0
BER type	ZNF730	0	1.79941	0.111	0.018	0
BER type	SCML2	0	1.80194	0.114	0.021	0
BER type	E2F8	0	1.79535	0.106	0.018	0
BER type	DMC1	0	2.26653	0.097	0.011	0
BER type	ORC1	0	1.91284	0.088	0.012	0
BER type	RAD54L	0	2.02569	0.085	0.011	0
BER type	MNX1	0	1.95112	0.084	0.012	0
BER type	ZBTB8B	0	2.05781	0.076	0.01	0
BER type	AL161891.1	4.58922e-308	1.51415	0.114	0.022	6.55524e-304
BER type	SDC1	3.10595e-307	2.21444	0.085	0.013	4.43653e-303
BER type	PAXIP1	1.66003e-306	1.04818	0.216	0.066	2.37119e-302
BER type	C1QL1	6.7914e-306	1.47129	0.14	0.032	9.70084e-302
BER type	FANCC	4.39254e-302	1.39538	0.145	0.034	6.2743e-298
BER type	PUSL1	5.34029e-302	1.15546	0.197	0.058	7.62807e-298
BER type	RAD54B	2.24418e-300	1.61027	0.111	0.021	3.20559e-296
BER type	RIBC2	2.4998e-300	2.07709	0.068	0.008	3.57072e-296
BER type	TEAD2	5.81242e-300	1.06592	0.258	0.089	8.30246e-296
BER type	TPBG	1.23825e-298	1.08407	0.223	0.071	1.76872e-294
BER type	PHYHD1	1.02847e-297	1.07427	0.234	0.076	1.46907e-293
BER type	SHCBP1	3.59207e-297	1.30113	0.138	0.032	5.13091e-293
BER type	AC079922.2	2.58457e-296	1.32799	0.157	0.04	3.6918e-292
BER type	RLBP1	4.18926e-294	1.39081	0.178	0.05	5.98393e-290
BER type	BAIAP2L2	9.61872e-293	1.86872	0.109	0.021	1.37394e-288
BER type	TMEM255A	2.2203e-292	1.67626	0.119	0.025	3.17147e-288
BER type	SKP2	2.07521e-290	1.13835	0.173	0.047	2.96423e-286
BER type	C4orf46	1.3059e-289	1.12981	0.173	0.047	1.86534e-285
BER type	ZBTB8A	1.60681e-288	1.24464	0.177	0.049	2.29517e-284
BER type	VSIG10	1.40155e-285	1.04736	0.224	0.073	2.00197e-281
BER type	GPR37	1.47504e-284	1.1151	0.254	0.089	2.10695e-280
BER type	ZNF280B	2.01547e-283	1.07656	0.219	0.071	2.8789e-279
BER type	PCDHGA12	3.54212e-283	1.04306	0.188	0.055	5.05956e-279
BER type	FEZ1	8.6474e-282	1.06762	0.225	0.074	1.23519e-277
BER type	SCN1B	2.36041e-278	1.19227	0.157	0.041	3.3716e-274
BER type	MAP7D2	6.63793e-278	2.09174	0.073	0.011	9.48162e-274
BER type	TMEM201	4.24577e-275	1.28129	0.163	0.045	6.06466e-271
BER type	TEAD4	1.69712e-271	1.40275	0.15	0.039	2.42417e-267
BER type	MTBP	2.94663e-271	1.24177	0.138	0.034	4.20897e-267
BER type	MARK1	1.20638e-270	1.44668	0.135	0.033	1.72319e-266
BER type	RAB9B	2.1666e-268	1.69017	0.118	0.026	3.09477e-264
BER type	ZNF519	5.16786e-268	1.00179	0.173	0.05	7.38178e-264
BER type	MPP2	5.38444e-268	1.76587	0.096	0.018	7.69114e-264
BER type	PTPRG-AS1	1.76151e-267	1.31379	0.121	0.027	2.51615e-263
BER type	POLA2	5.18587e-263	1.33762	0.12	0.027	7.4075e-259
BER type	MACROD1	1.67972e-262	1.09411	0.258	0.097	2.39932e-258
BER type	DPYSL4	2.1836e-262	1.68041	0.114	0.025	3.11905e-258
BER type	POLE2	2.34004e-261	1.86848	0.071	0.011	3.34251e-257
BER type	CTSV	4.47065e-261	1.74788	0.098	0.019	6.38588e-257
BER type	CBX2	7.91112e-260	1.28242	0.152	0.041	1.13002e-255
BER type	RAP1GAP	6.00781e-259	1.41445	0.131	0.032	8.58155e-255
BER type	MIR924HG	2.67595e-256	1.98034	0.069	0.01	3.82233e-252
BER type	FAXC	7.51148e-256	1.38194	0.148	0.04	1.07294e-251
BER type	FHDC1	9.20197e-256	1.11983	0.209	0.07	1.31441e-251
BER type	RNASEH2A	5.44434e-255	1.55878	0.096	0.019	7.77669e-251
BER type	IRX3	1.0013e-254	1.18121	0.194	0.062	1.43025e-250
BER type	STS	1.65632e-254	1.05068	0.166	0.048	2.36589e-250
BER type	AC007106.2	1.12372e-253	1.04472	0.177	0.053	1.60512e-249
BER type	KIT	4.69134e-253	1.00806	0.21	0.07	6.7011e-249
BER type	PM20D2	7.74027e-253	1.06547	0.175	0.053	1.10562e-248
BER type	AC124864.3	2.62003e-250	1.12412	0.18	0.055	3.74244e-246
BER type	AADAT	3.36703e-250	1.45502	0.107	0.023	4.80947e-246
BER type	RAB23	3.92139e-246	1.23914	0.161	0.047	5.60132e-242
BER type	KBTBD7	2.07986e-245	1.00125	0.216	0.075	2.97088e-241
BER type	PLSCR4	1.35211e-244	1.05443	0.215	0.075	1.93135e-240
BER type	THEM6	4.14315e-244	1.02156	0.227	0.082	5.91808e-240
BER type	NEMP1	7.1417e-244	1.13036	0.144	0.039	1.02012e-239
BER type	PKN3	5.36588e-242	1.26434	0.109	0.025	7.66462e-238
BER type	TMEM108	1.07685e-238	1.57698	0.089	0.017	1.53818e-234
BER type	NCKIPSD	1.31463e-238	1.06932	0.201	0.068	1.87781e-234
BER type	DNA2	2.42834e-238	1.28797	0.092	0.018	3.46864e-234
BER type	C15orf41	2.95894e-238	1.11257	0.151	0.043	4.22655e-234
BER type	MAGI3	8.17187e-236	1.03099	0.177	0.055	1.16727e-231
BER type	HPSE	2.56192e-235	1.08602	0.118	0.028	3.65945e-231
BER type	MRAS	5.15717e-233	1.0077	0.236	0.089	7.3665e-229
BER type	USP49	1.94558e-232	1.02814	0.154	0.045	2.77906e-228
BER type	LYPD6	1.1271e-231	1.99238	0.064	0.01	1.60995e-227
BER type	KCTD15	2.95366e-230	1.02176	0.214	0.077	4.219e-226
BER type	TRIP13	3.74773e-229	1.36527	0.099	0.022	5.35325e-225
BER type	TAFA5	6.15792e-229	1.29686	0.136	0.037	8.79597e-225
BER type	USP31	6.56306e-229	1.2868	0.13	0.035	9.37467e-225
BER type	TONSL	1.33882e-226	1.24066	0.118	0.029	1.91238e-222
BER type	MIMT1	1.72199e-225	1.77363	0.067	0.011	2.45969e-221
BER type	POGLUT2	4.316e-224	1.30187	0.131	0.035	6.16498e-220
BER type	LRP8	1.13413e-223	1.02463	0.133	0.036	1.61999e-219
BER type	INAVA	3.4424e-222	1.68612	0.073	0.013	4.91713e-218
BER type	CRYBB2	9.30994e-221	1.3719	0.097	0.022	1.32983e-216
BER type	ANKS6	1.49453e-219	1.13183	0.159	0.049	2.13479e-215
BER type	TENT5B	2.79709e-219	1.25151	0.156	0.048	3.99537e-215
BER type	SLC4A4	8.32102e-217	1.40188	0.102	0.024	1.18857e-212
BER type	WDR90	1.87478e-214	1.07094	0.132	0.037	2.67793e-210
BER type	KIAA1522	5.42514e-213	1.38918	0.116	0.03	7.74927e-209
BER type	STRIP2	1.85493e-211	1.19435	0.136	0.039	2.64958e-207
BER type	ERVMER61-1	1.26454e-209	1.24908	0.116	0.03	1.80626e-205
BER type	RAVER2	2.29573e-209	1.27146	0.125	0.034	3.27922e-205
BER type	TTLL12	2.83266e-208	1.00025	0.175	0.059	4.04617e-204
BER type	RBPMS2	5.74079e-208	1.63873	0.093	0.021	8.20014e-204
BER type	MEX3D	3.50184e-206	1.28173	0.125	0.035	5.00203e-202
BER type	SLC25A10	4.01611e-205	1.22881	0.119	0.032	5.73661e-201
BER type	KIF24	8.44207e-205	1.27951	0.094	0.021	1.20587e-200
BER type	PDSS1	1.13764e-202	1.07039	0.114	0.03	1.625e-198
BER type	MELTF-AS1	1.68661e-202	1.43554	0.099	0.024	2.40916e-198
BER type	SLC25A15	2.36065e-201	1.24918	0.127	0.036	3.37195e-197
BER type	SHOX2	4.38991e-201	1.08116	0.135	0.04	6.27054e-197
BER type	CU638689.4	7.64601e-201	1.14413	0.108	0.027	1.09216e-196
BER type	CHRNA5	3.57208e-200	1.39614	0.097	0.023	5.10236e-196
BER type	POLQ	5.09549e-200	1.23544	0.1	0.024	7.27839e-196
BER type	GPC1	5.26918e-198	1.15337	0.146	0.046	7.52649e-194
BER type	ARHGAP20	2.55616e-197	1.03012	0.156	0.051	3.65122e-193
BER type	DEPDC1B	1.54968e-196	1.17002	0.1	0.025	2.21356e-192
BER type	DCLRE1B	1.6017e-193	1.28029	0.098	0.024	2.28786e-189
BER type	MYO5C	5.92713e-192	1.34695	0.081	0.017	8.46632e-188
BER type	STIL	2.85442e-189	1.0189	0.116	0.032	4.07725e-185
BER type	FNDC10	1.52914e-187	1.1607	0.166	0.058	2.18422e-183
BER type	POU4F1	2.13207e-186	1.85733	0.061	0.01	3.04545e-182
BER type	SLC37A4	1.00897e-185	1.12965	0.14	0.044	1.44122e-181
BER type	LINC01739	1.35104e-185	1.34029	0.104	0.027	1.92983e-181
BER type	XYLB	2.84685e-185	1.19759	0.127	0.038	4.06644e-181
BER type	XRCC3	6.52524e-185	1.42042	0.083	0.019	9.32066e-181
BER type	TENM3	6.90293e-185	1.10382	0.118	0.034	9.86015e-181
BER type	DDAH1	6.8816e-184	1.70447	0.063	0.011	9.82968e-180
BER type	ANGPTL2	3.0561e-182	1.43853	0.088	0.021	4.36533e-178
BER type	RHEBL1	9.19336e-182	1.24022	0.092	0.022	1.31318e-177
BER type	KLHL13	9.69263e-182	1.02961	0.124	0.037	1.38449e-177
BER type	PABPC4L	6.79507e-181	1.61143	0.073	0.015	9.70607e-177
BER type	RGS22	7.33148e-180	1.7105	0.058	0.01	1.04723e-175
BER type	SLC47A1	4.9941e-176	1.87603	0.056	0.009	7.13357e-172
BER type	TLCD4	1.45435e-175	1.41784	0.096	0.025	2.0774e-171
BER type	CCDC15	6.04037e-175	1.34642	0.073	0.016	8.62807e-171
BER type	EPB41L4A	2.52413e-174	1.15466	0.089	0.022	3.60546e-170
BER type	GPT2	7.14854e-174	1.07738	0.099	0.026	1.0211e-169
BER type	FANCE	6.25421e-173	1.17443	0.094	0.024	8.93351e-169
BER type	RASEF	5.4475e-172	1.5325	0.074	0.016	7.78121e-168
BER type	LHFPL3	2.28736e-171	1.47864	0.082	0.019	3.26726e-167
BER type	TMEFF1	2.69673e-171	1.18509	0.109	0.031	3.85201e-167
BER type	PCSK1	6.88493e-170	1.43006	0.088	0.022	9.83443e-166
BER type	NCAPH	8.37491e-170	1.12282	0.091	0.023	1.19627e-165
BER type	DDX11-AS1	1.7267e-168	1.73922	0.052	0.009	2.46641e-164
BER type	AP005901.5	2.36108e-165	1.22153	0.082	0.02	3.37257e-161
BER type	NT5M	2.25384e-163	1.52197	0.086	0.022	3.21939e-159
BER type	AC124016.2	7.00388e-163	1.04844	0.102	0.029	1.00043e-158
BER type	DIRAS1	1.19954e-161	1.37389	0.106	0.031	1.71342e-157
BER type	HSPB6	2.12236e-160	1.13464	0.094	0.026	3.03159e-156
BER type	B4GALT6	1.17604e-159	1.06703	0.137	0.047	1.67985e-155
BER type	FGF14-AS2	7.79314e-155	1.09953	0.122	0.04	1.11317e-150
BER type	AL590235.1	1.2122e-154	1.05478	0.127	0.042	1.73151e-150
BER type	LRP3	9.14389e-153	1.41016	0.067	0.015	1.30611e-148
BER type	ENHO	1.40656e-152	1.29173	0.092	0.025	2.00913e-148
BER type	FGD1	3.69017e-152	1.04776	0.133	0.046	5.27105e-148
BER type	RTN4R	4.75176e-148	1.42128	0.071	0.017	6.78741e-144
BER type	AC011043.1	7.77642e-147	1.10962	0.089	0.024	1.11078e-142
BER type	TLCD3A	1.19939e-145	1.30312	0.092	0.026	1.7132e-141
BER type	AL138820.1	2.51739e-145	1.4735	0.053	0.01	3.59584e-141
BER type	STOX1	2.78946e-145	1.80215	0.047	0.008	3.98446e-141
BER type	AL031847.1	2.60699e-144	1.58552	0.059	0.012	3.72383e-140
BER type	TNFRSF11B	8.94269e-144	1.37677	0.064	0.014	1.27737e-139
BER type	FAM149A	4.93827e-142	1.13213	0.116	0.038	7.05382e-138
BER type	C5orf34	8.82265e-136	1.03514	0.077	0.02	1.26023e-131
BER type	HAGLROS	4.54945e-133	1.24268	0.097	0.03	6.49843e-129
BER type	ZNF695	5.35461e-133	1.47857	0.056	0.012	7.64853e-129
BER type	SOX1	7.53656e-133	1.26683	0.078	0.021	1.07652e-128
BER type	2025-03-02	5.89589e-132	1.18016	0.095	0.029	8.42169e-128
BER type	KIAA1614	1.62491e-129	1.04271	0.086	0.025	2.32103e-125
BER type	HOXA7	8.36471e-129	1.11685	0.113	0.039	1.19482e-124
BER type	IRX6	9.75493e-129	1.06828	0.105	0.035	1.39339e-124
BER type	TRIM45	3.58445e-128	1.08123	0.074	0.02	5.12003e-124
BER type	PRRT4	4.45115e-128	1.57986	0.046	0.009	6.35802e-124
BER type	C8orf48	6.97293e-128	1.09953	0.088	0.026	9.96014e-124
BER type	FOXP4-AS1	8.28576e-128	1.04942	0.104	0.034	1.18354e-123
BER type	KCNJ12	2.6642e-127	1.46579	0.06	0.014	3.80554e-123
BER type	DDIAS	9.18997e-127	1.60405	0.052	0.011	1.3127e-122
BER type	AC107214.1	4.23262e-126	1.29954	0.06	0.014	6.04588e-122
BER type	LINC01234	5.52349e-126	1.14369	0.083	0.024	7.88976e-122
BER type	CNTNAP5	6.58209e-126	1.13616	0.057	0.013	9.40186e-122
BER type	OLIG1	7.26819e-122	1.32786	0.073	0.02	1.03819e-117
BER type	AS3MT	2.11079e-121	1.32943	0.064	0.016	3.01505e-117
BER type	CENPO	3.62378e-121	1.00791	0.078	0.022	5.17621e-117
BER type	STKLD1	4.36409e-120	1.12529	0.077	0.022	6.23367e-116
BER type	IPO9-AS1	2.51829e-118	1.34896	0.061	0.015	3.59712e-114
BER type	EME1	3.68056e-118	1.2497	0.051	0.011	5.25731e-114
BER type	SPIRE2	6.75449e-118	1.24761	0.071	0.019	9.64812e-114
BER type	COL24A1	1.0086e-117	1.00384	0.077	0.022	1.44068e-113
BER type	TTYH1	1.20574e-116	1.09082	0.128	0.05	1.72228e-112
BER type	DLX5	1.63531e-115	1.13992	0.074	0.021	2.33588e-111
BER type	RGMA	7.07203e-115	1.14136	0.074	0.021	1.01017e-110
BER type	FAAP24	2.2286e-114	1.14127	0.083	0.026	3.18334e-110
BER type	ALDH4A1	3.9335e-113	1.01014	0.095	0.032	5.61861e-109
BER type	ZNF560	3.62255e-112	1.12855	0.068	0.019	5.17445e-108
BER type	AL022162.1	3.08835e-111	1.12015	0.082	0.026	4.41139e-107
BER type	ANXA3	5.30703e-110	1.00602	0.081	0.025	7.58057e-106
BER type	AC004943.2	1.61749e-108	1.02781	0.069	0.02	2.31042e-104
BER type	NKAIN3	8.14896e-105	1.13089	0.074	0.022	1.164e-100
BER type	MRAP2	1.59696e-104	1.39512	0.048	0.011	2.2811e-100
BER type	WDR62	3.92103e-103	1.14815	0.052	0.013	5.6008e-99
BER type	SUV39H1	8.07914e-103	1.07496	0.068	0.02	1.15402e-98
BER type	BCAN	1.56534e-102	1.24988	0.214	0.111	2.23594e-98
BER type	ARHGEF16	3.81622e-102	1.42519	0.048	0.011	5.45109e-98
BER type	GAREM2	2.59842e-101	1.06832	0.062	0.017	3.71158e-97
BER type	CHRDL1	1.72583e-100	1.01017	0.044	0.01	2.46518e-96
BER type	MGST1	1.81712e-100	1.16618	0.09	0.031	2.59557e-96
BER type	ZNF185	5.59019e-100	1.16723	0.064	0.018	7.98503e-96
BER type	ATRNL1	1.87148e-96	1.12739	0.061	0.017	2.67323e-92
BER type	ZNRF3	2.83923e-96	1.05111	0.08	0.027	4.05555e-92
BER type	TICRR	7.83145e-95	1.1849	0.05	0.013	1.11864e-90
BER type	HAUS7	1.38287e-94	1.03811	0.073	0.023	1.97529e-90
BER type	HPDL	3.40493e-94	1.2484	0.056	0.015	4.86361e-90
BER type	C9orf116	3.93627e-94	1.24453	0.052	0.013	5.62257e-90
BER type	HPSE2	1.16478e-90	1.37474	0.045	0.011	1.66378e-86
BER type	LAMA1	9.31235e-90	1.07735	0.084	0.03	1.33018e-85
BER type	BEX1	8.66332e-89	1.23332	0.093	0.035	1.23747e-84
BER type	THAP10	1.83175e-88	1.24041	0.046	0.012	2.61647e-84
BER type	CLGN	7.48694e-88	1.40778	0.039	0.009	1.06943e-83
BER type	KIF18B	1.52117e-87	1.29944	0.046	0.012	2.17284e-83
BER type	AC017100.1	2.4122e-87	1.39611	0.061	0.019	3.44559e-83
BER type	HOXA13	1.14477e-86	1.15229	0.048	0.012	1.63518e-82
BER type	TMEM240	1.72588e-86	1.07141	0.063	0.02	2.46525e-82
BER type	2025-03-01	7.64373e-86	1.19441	0.061	0.018	1.09183e-81
BER type	CHST9	1.58513e-85	1.08992	0.087	0.033	2.2642e-81
BER type	FOXD2-AS1	1.46696e-84	1.02217	0.062	0.019	2.0954e-80
BER type	RAB36	6.93223e-82	1.26132	0.048	0.013	9.90199e-78
BER type	AC016027.2	2.05606e-80	1.24941	0.051	0.015	2.93687e-76
BER type	DUSP9	9.03411e-80	1.36125	0.044	0.011	1.29043e-75
BER type	PANK1	9.38535e-80	1.15223	0.057	0.017	1.3406e-75
BER type	PPP1R14C	1.20871e-79	1.31946	0.052	0.015	1.72652e-75
BER type	CAND2	3.36766e-79	1.32976	0.042	0.011	4.81036e-75
BER type	S100A2	2.83133e-78	2.29522	0.095	0.038	4.04428e-74
BER type	CHST6	3.03204e-78	1.02313	0.064	0.021	4.33096e-74
BER type	FREM2	3.11604e-77	1.08553	0.057	0.018	4.45095e-73
BER type	AFF2	3.84416e-77	1.02867	0.054	0.016	5.491e-73
BER type	CES1	7.39861e-77	1.12932	0.059	0.019	1.05682e-72
BER type	CCDC74A	2.35811e-76	1.37607	0.039	0.01	3.36833e-72
BER type	MT1A	3.69904e-76	1.05887	0.038	0.009	5.28371e-72
BER type	AC093787.2	3.97692e-76	1.356	0.042	0.011	5.68063e-72
BER type	AP001347.1	4.74597e-76	1.09185	0.045	0.012	6.77914e-72
BER type	MTFR2	1.39937e-75	1.0608	0.044	0.012	1.99886e-71
BER type	PPM1E	2.73139e-75	1.30442	0.04	0.01	3.90152e-71
BER type	N4BP3	6.32932e-75	1.07555	0.051	0.015	9.0408e-71
BER type	SDK1	9.79139e-75	1.05254	0.049	0.014	1.3986e-70
BER type	SRSF12	1.79061e-74	1.14531	0.04	0.01	2.55771e-70
BER type	TRAIP	5.0038e-73	1.01039	0.051	0.015	7.14742e-69
BER type	REXO5	4.49418e-72	1.23678	0.038	0.009	6.41948e-68
BER type	OSBPL6	2.16731e-71	1.08643	0.048	0.014	3.09579e-67
BER type	PLPPR4	1.26206e-70	1.10923	0.041	0.011	1.80273e-66
BER type	RASL10B	4.72322e-70	1.27448	0.039	0.01	6.74664e-66
BER type	STBD1	1.85274e-68	1.1553	0.043	0.012	2.64646e-64
BER type	MPPED2-AS1	4.1546e-68	1.08826	0.036	0.009	5.93443e-64
BER type	PAX6	5.80406e-68	1.18638	0.044	0.013	8.29053e-64
BER type	GABRB3	9.99817e-68	1.01228	0.061	0.021	1.42814e-63
BER type	FOXL2	1.07349e-67	1.32735	0.035	0.009	1.53338e-63
BER type	MYORG	1.55827e-67	1.00379	0.044	0.013	2.22583e-63
BER type	AC147651.1	2.48339e-66	1.05455	0.044	0.013	3.54728e-62
BER type	TMEM215	1.07262e-65	1.40318	0.035	0.009	1.53214e-61
BER type	C3orf67	1.5293e-65	1.0444	0.048	0.015	2.18445e-61
BER type	CBS	7.98963e-65	1.02961	0.034	0.009	1.14124e-60
BER type	SCARA3	1.10461e-64	1.4085	0.04	0.011	1.57782e-60
BER type	SLC13A3	1.05817e-63	1.13628	0.049	0.016	1.51149e-59
BER type	AC005914.1	4.93821e-63	1.07012	0.037	0.01	7.05374e-59
BER type	LRAT	6.56968e-61	1.11799	0.041	0.012	9.38413e-57
BER type	DCDC2	9.23972e-61	1.07607	0.055	0.02	1.3198e-56
BER type	MOCOS	1.26234e-59	1.0921	0.046	0.015	1.80312e-55
BER type	CASC2	1.42872e-58	1.03532	0.042	0.013	2.04079e-54
BER type	VGF	1.81665e-56	1.0279	0.131	0.068	2.5949e-52
BER type	AC010531.6	1.96981e-55	1.03783	0.035	0.01	2.81368e-51
BER type	PTGER1	3.14896e-54	1.1635	0.034	0.01	4.49797e-50
BER type	AGT	3.41199e-54	1.49035	0.039	0.012	4.87369e-50
BER type	PI15	1.26505e-53	1.00011	0.06	0.023	1.807e-49
BER type	LRRC20	3.20747e-52	1.09825	0.034	0.01	4.58156e-48
BER type	STK32B	8.50239e-52	1.02302	0.046	0.016	1.21448e-47
BER type	AC009005.1	3.4776e-50	1.1397	0.032	0.009	4.9674e-46
BER type	NECAB2	6.19389e-49	1.06016	0.031	0.009	8.84735e-45
BER type	GNAZ	1.28778e-48	1.01401	0.032	0.009	1.83946e-44
BER type	DOCK9-DT	2.85544e-47	1.22892	0.031	0.009	4.07871e-43
BER type	LINC00997	5.05564e-47	1.3739	0.032	0.01	7.22147e-43
BER type	ESPL1	9.05072e-47	1.05751	0.031	0.009	1.29281e-42
BER type	GPR3	2.30404e-46	1.21319	0.03	0.009	3.29109e-42
BER type	AMHR2	3.67871e-46	1.16137	0.042	0.015	5.25468e-42
BER type	ZNF492	4.29658e-45	1.02564	0.032	0.01	6.13723e-41
BER type	HS6ST2	1.20219e-44	1.05798	0.034	0.011	1.7172e-40
BER type	PLS1	1.8481e-44	1.10499	0.034	0.011	2.63983e-40
BER type	SLC30A10	8.0055e-44	1.22823	0.034	0.011	1.14351e-39
BER type	KCTD14	6.06716e-40	1.17338	0.038	0.014	8.66633e-36
BER type	LINC01703	4.48035e-38	1.02865	0.032	0.011	6.39974e-34
BER type	LINC01102	7.71025e-37	1.06395	0.035	0.013	1.10133e-32
BER type	LINC01152	6.34221e-36	1.0006	0.043	0.018	9.05922e-32
BER type	AL031778.1	1.56661e-33	1.01902	0.035	0.014	2.23775e-29
BER type	HIST1H1A	4.50424e-32	1.43215	0.042	0.018	6.43386e-28
BER type	ANGPTL7	2.3072e-24	1.01452	0.047	0.023	3.2956e-20
BER type	AC027237.3	2.8209e-20	1.00738	0.025	0.01	4.02937e-16
BER type	GRIN2A	8.53685e-10	1.05243	0.023	0.012	1.2194e-05
Inflammatory type	LRRC75A	4.78947e-64	1.12635	0.457	0.258	6.84128e-60
Inflammatory type	MAGEA4	1.2745e-61	1.56454	0.123	0.033	1.82049e-57
Inflammatory type	CNDP1	5.56197e-44	1.98241	0.087	0.024	7.94472e-40
Inflammatory type	C1QTNF3	2.38242e-43	1.65587	0.131	0.046	3.40305e-39
Inflammatory type	SERPINA3	8.9465e-42	1.30439	0.34	0.189	1.27792e-37
Inflammatory type	APOC2	1.04275e-41	1.64239	0.142	0.053	1.48946e-37
Inflammatory type	MPZ	1.10381e-41	1.35682	0.178	0.073	1.57669e-37
Inflammatory type	CDH6	5.3768e-36	1.43693	0.083	0.025	7.68022e-32
Inflammatory type	SERPINA5	4.42799e-35	1.7163	0.072	0.02	6.32495e-31
Inflammatory type	CMTM5	1.52471e-32	1.42764	0.094	0.032	2.1779e-28
Inflammatory type	COL20A1	1.15177e-31	1.46164	0.061	0.016	1.64518e-27
Inflammatory type	ITIH6	1.28503e-31	1.95525	0.057	0.015	1.83554e-27
Inflammatory type	PTN	1.74291e-29	1.61352	0.106	0.04	2.48958e-25
Inflammatory type	ENPP2	4.3696e-29	1.03039	0.14	0.061	6.24153e-25
Inflammatory type	PHOX2B	9.55303e-29	1.12429	0.059	0.016	1.36455e-24
Inflammatory type	FXYD3	9.93312e-29	1.0736	0.328	0.205	1.41885e-24
Inflammatory type	MAGEA3	1.9135e-27	1.09679	0.117	0.048	2.73324e-23
Inflammatory type	TF	2.20803e-26	1.27744	0.107	0.043	3.15394e-22
Inflammatory type	ATP1A2	2.80511e-26	1.74303	0.045	0.011	4.00681e-22
Inflammatory type	BAALC	9.80232e-25	1.09901	0.137	0.063	1.40016e-20
Inflammatory type	FABP7	1.17747e-24	1.62156	0.107	0.045	1.68189e-20
Inflammatory type	LINC02552	1.44036e-24	1.92709	0.057	0.017	2.05741e-20
Inflammatory type	SOX2-OT	6.87529e-24	1.32024	0.082	0.03	9.82067e-20
Inflammatory type	MEGF10	3.40802e-22	1.00551	0.134	0.064	4.86801e-18
Inflammatory type	KLHDC8A	1.22249e-21	1.43635	0.047	0.014	1.74621e-17
Inflammatory type	SEMA3D	3.30165e-21	1.31184	0.052	0.016	4.71608e-17
Inflammatory type	MEG3	5.37776e-21	1.20314	0.094	0.04	7.68159e-17
Inflammatory type	MMP15	6.18596e-21	1.16469	0.085	0.034	8.83602e-17
Inflammatory type	FAM133A	1.09598e-20	1.27154	0.052	0.017	1.5655e-16
Inflammatory type	MAGEA11	1.22279e-20	1.63138	0.052	0.017	1.74663e-16
Inflammatory type	RHOU	2.26342e-20	1.24409	0.076	0.029	3.23307e-16
Inflammatory type	ELOVL2	3.25938e-20	1.03963	0.146	0.075	4.6557e-16
Inflammatory type	DTX4	4.90326e-20	1.58576	0.047	0.014	7.00381e-16
Inflammatory type	MEG8	1.24434e-19	1.23829	0.071	0.027	1.77741e-15
Inflammatory type	COL22A1	4.83017e-19	1.43163	0.077	0.032	6.89942e-15
Inflammatory type	GRIK3	5.59797e-19	1.04654	0.06	0.022	7.99614e-15
Inflammatory type	LRRC4C	9.54422e-19	1.28793	0.042	0.012	1.3633e-14
Inflammatory type	SORCS2	7.47433e-18	1.59883	0.048	0.016	1.06763e-13
Inflammatory type	NGFR	1.46462e-17	1.19726	0.056	0.02	2.09207e-13
Inflammatory type	HHATL	1.60293e-17	1.56097	0.058	0.021	2.28962e-13
Inflammatory type	CLDN11	6.09136e-17	1.37196	0.04	0.012	8.7009e-13
Inflammatory type	CADM4	3.2562e-16	1.06632	0.095	0.045	4.65116e-12
Inflammatory type	HAND2-AS1	5.44439e-16	1.33298	0.065	0.026	7.77677e-12
Inflammatory type	NRXN2	6.06836e-16	1.10008	0.073	0.031	8.66805e-12
Inflammatory type	TMEM178B	7.46456e-16	1.22588	0.061	0.024	1.06624e-11
Inflammatory type	SCG3	7.71638e-16	1.34117	0.041	0.013	1.10221e-11
Inflammatory type	INSC	8.49722e-16	1.33778	0.033	0.01	1.21374e-11
Inflammatory type	EFS	1.32937e-15	1.29669	0.055	0.021	1.89888e-11
Inflammatory type	AC106707.1	1.65113e-15	1.26596	0.083	0.038	2.35847e-11
Inflammatory type	C4orf19	2.20628e-15	1.2516	0.085	0.04	3.15145e-11
Inflammatory type	NRCAM	2.37074e-15	1.31873	0.072	0.031	3.38636e-11
Inflammatory type	SLC22A23	3.09246e-15	1.38394	0.039	0.013	4.41727e-11
Inflammatory type	GRIN2A	5.73911e-15	1.36241	0.038	0.012	8.19774e-11
Inflammatory type	LRRTM2	7.84734e-15	1.15897	0.058	0.023	1.12091e-10
Inflammatory type	IGFBP3	9.86684e-15	1.19107	0.083	0.038	1.40938e-10
Inflammatory type	C1QL1	1.18169e-14	1.37917	0.08	0.037	1.68793e-10
Inflammatory type	ITGB3	1.48996e-14	1.049	0.08	0.037	2.12826e-10
Inflammatory type	FREM1	1.62759e-14	1.12405	0.045	0.016	2.32485e-10
Inflammatory type	TMEFF2	1.69994e-14	1.33275	0.045	0.016	2.4282e-10
Inflammatory type	LINC01436	4.98067e-14	1.41231	0.058	0.024	7.11439e-10
Inflammatory type	ADAMTS4	7.9727e-14	1.38632	0.054	0.022	1.13882e-09
Inflammatory type	AL110292.1	1.67419e-13	1.30913	0.035	0.011	2.39141e-09
Inflammatory type	AC092069.1	1.86696e-13	1.18422	0.068	0.031	2.66677e-09
Inflammatory type	AC010894.3	4.45193e-13	1.34051	0.039	0.014	6.35913e-09
Inflammatory type	LINC01579	5.61426e-13	1.07402	0.038	0.014	8.01941e-09
Inflammatory type	CTNNA2	7.93678e-13	1.26445	0.043	0.016	1.13369e-08
Inflammatory type	ASCL1	1.38234e-12	1.22536	0.033	0.011	1.97454e-08
Inflammatory type	B3GALT1	1.61183e-12	1.14973	0.043	0.016	2.30234e-08
Inflammatory type	DPYSL3	2.01366e-12	1.00005	0.126	0.072	2.87631e-08
Inflammatory type	NKAIN4	2.17543e-12	1.23616	0.054	0.023	3.10739e-08
Inflammatory type	KCNJ10	2.39356e-12	1.22626	0.037	0.013	3.41896e-08
Inflammatory type	IGSF9B	5.75444e-12	1.44794	0.031	0.01	8.21964e-08
Inflammatory type	ZNF536	1.51319e-11	1.3505	0.045	0.018	2.16145e-07
Inflammatory type	SHD	1.54143e-11	1.23451	0.036	0.013	2.20178e-07
Inflammatory type	SLC35F1	2.14487e-11	1.11122	0.05	0.021	3.06374e-07
Inflammatory type	ACSS3	7.89975e-11	1.33285	0.035	0.013	1.1284e-06
Inflammatory type	NKILA	1.94576e-10	1.08379	0.031	0.011	2.77932e-06
Inflammatory type	MT1G	3.7918e-10	1.05519	0.053	0.024	5.4162e-06
Inflammatory type	ELAVL4	7.06455e-10	1.30869	0.03	0.011	1.0091e-05
Inflammatory type	ZNF385B	9.0627e-10	1.04002	0.123	0.078	1.29452e-05
Inflammatory type	FAM181B	1.19838e-09	1.31612	0.031	0.011	1.71176e-05
Inflammatory type	AC008147.2	1.57962e-09	1.18122	0.036	0.014	2.25634e-05
Inflammatory type	DKK3	2.5513e-09	1.25312	0.045	0.02	3.64427e-05
Inflammatory type	ERBB4	2.63906e-09	1.20936	0.028	0.01	3.76964e-05
Inflammatory type	ARHGAP39	4.0429e-09	1.00654	0.057	0.028	5.77488e-05
Inflammatory type	GDNF	5.13291e-09	1.04537	0.066	0.035	7.33185e-05
Inflammatory type	MAPK8IP1	5.23999e-09	1.09607	0.048	0.022	7.4848e-05
Inflammatory type	BVES	5.93924e-09	1.02934	0.038	0.016	8.48361e-05
Inflammatory type	UCHL1	6.46224e-09	1.18828	0.035	0.014	9.23066e-05
Inflammatory type	TMEM171	9.54364e-09	1.49946	0.025	0.009	0.000136321
Inflammatory type	AL358334.2	2.06109e-08	1.63975	0.03	0.012	0.000294406
Inflammatory type	AP001020.2	4.34709e-08	1.09009	0.03	0.012	0.000620939
Inflammatory type	GJB2	4.63703e-08	1.22759	0.054	0.028	0.000662354
Inflammatory type	SOX11	1.34817e-07	1.00933	0.032	0.014	0.00192572
Inflammatory type	KCNK15-AS1	3.16767e-07	1.04695	0.032	0.014	0.00452469
Inflammatory type	F3	3.8415e-07	1.02203	0.037	0.018	0.0054872
Inflammatory type	AC017100.1	4.2559e-07	1.24426	0.042	0.021	0.00607913
Inflammatory type	UNC80	4.67533e-07	1.0055	0.029	0.012	0.00667824
Inflammatory type	AC099792.1	6.36821e-07	1.13425	0.031	0.014	0.00909635
Inflammatory type	KIF1A	1.29205e-06	1.03594	0.033	0.016	0.0184557
Inflammatory type	PTCHD4	3.30176e-06	1.00304	0.038	0.019	0.0471624
Inflammatory type	GAL	3.43404e-06	1.1728	0.026	0.012	0.0490519

## Sheet: ST.5
Supplementary Table S5. Baseline characteristics of TCGA SKCM
Clinical factor		n (%)
Sex	Female	180 (38.05%)
	Male	293 (61.95%)
Age	Unknown	8 (1.69%)
	> 65	163 (34.46%)
	≤ 65	302 (63.85%)
T stage	Unknown	77 (16.28%)
	T0-T2	152 (32.14%)
	T3	91 (19.24%)
	T4	153 (32.35%)
N stage	Unknown	58 (12.26%)
	N0	236 (49.89%)
	N1-N3	179 (37.84%)
M stage	Unknown	29 (6.13%)
	M0	419 (88.58%)
	M1	25 (5.29%)
Stage	Unknown	53 (11.21%)
	I-II	225 (47.57%)
	III-IV	195 (41.23%)
Tissue site	Unknown	1 (0.21%)
	Metastatic lesions	369 (78.01%)
	Primary tumor	103 (21.78%)
	Lymph Node	204 (43.13%)
	Others	269 (56.87%)
Immune subtype	D	203 (42.92%)
	NEF	121 (25.58%)
	NKT	149 (31.50%)
OS event	living	237 (51.63%)
	death	222 (48.37%)
Note: D, desert type; NEF, neutrophil, endothelial, and fibroblast infiltration type; NKT, NK cells, T cells, and B cells infiltration type; OS, overall survival.

## Sheet: ST.6
Suppelmentary Table S6: Baseline characteristics of validating cohort
Clinical factor		n (%)
Sex	Female	49 (44.94%)
	Male	40 (55.06%)
Age	≥60	53 (59.55%)
	<60	36 (40.45%)
Primary melanoma	Cutaneous	38 (42.70%)
	Others	51 (57.30%)

## Sheet: ST.7
Suppelmentary Table S7. Kruskal-Wallis test for association of APE1 and CD4 or CD8
		Number of patients	APE1 (+)	APE1 (++)	APE1 (+++)	Chi-square	P value
CD4	Negative	39	0.9	0.463415	0.0714286	32.2775	9.79574e-08
	Low	36	0.05	0.463415	0.571429
	Middle	14	0.05	0.0731707	0.357143
CD8	Negative	39	0.45	0.512195	0.321429	3.65406	0.160891
	Low	35	0.25	0.414634	0.464286
	Middle	15	0.3	0.0731707	0.214286
